# Supplementary material for: Dimensions of safety culture: a systematic review of quantitative, qualitative and mixed methods for assessing safety culture in hospitals
Source: HighWire-hosted journal article supplement (doi:10.1136/bmjopen-2020-043982), 2021-07-01
Supplement: bmjopen-2020-043982supp003_data_supplement.pdf [file bmjopen-2020-043982supp003_data_supplement.pdf]

| Citation                                                                                                           | Study year | Study purpose                                                         | Coded purpose                        | Methods       | Survey? | Survey name                                          | Interviews? | Focus groups? | Organisation al data and | Observation? | Framework? |
|--------------------------------------------------------------------------------------------------------------------|------------|-----------------------------------------------------------------------|--------------------------------------|---------------|---------|------------------------------------------------------|-------------|---------------|--------------------------|--------------|------------|
| Aaberg, O. R., R. Ballangrud, S. I. E. Husebø and M. L. Hall-Lord (2019). "An interprofessional team training"     | 2019       | The aim of this study was to explore if an interprofessional team     | 4. Evaluation of an intervention     | Quantitative  | Yes     | HSOPS                                                |             |               |                          |              |            |
| Abbas HAE, Bassiuni NA, Baddar FM. Perception of front-line healthcare providers toward patient safety:            | 2008       | The current study targeted the perceptions of front-line healthcare   | 1. Descriptive or exploratory assess | Quantitative  | Yes     | SCSu                                                 |             |               |                          |              |            |
| Abdallah, W., C. Johnson, C. Nitzl and M. A. Mohammed (2019). "Organizational learning and patient safety"         | 2019       | The purpose of this paper is to explore the relationship between      | 1. Descriptive or exploratory assess | Quantitative  | Yes     | Survey on Patient Safety Culture                     |             |               |                          |              |            |
| Abdi Z, Delgoshahi B, Ravaghi H, Abbasi M, Heyrani A. The culture of patient safety in an Iranian intensive        | 2015       | To explore nurses' and physicians' attitudes and perceptions relev    | 1. Descriptive or exploratory assess | Mixed methods | Yes     | SAQ                                                  | Yes         |               |                          |              |            |
| Abdou HA, Sabe KM. A baseline assessment of patient safety culture among nurses at Student University I            | 2011       | to assess patient safety culture among nurses at Student Universi     | 1. Descriptive or exploratory assess | Quantitative  | Yes     | SAQ                                                  |             |               |                          |              |            |
| Aboshaiqah AE, Baker OG. Assessment of nurses' perceptions of patient safety culture in a Saudi Arabia ho          | 2013       | The purpose of this study was to identify factors that nurses perc    | 2. Testing relationships among vari  | Quantitative  | Yes     | HSOPS                                                |             |               |                          |              |            |
| Abou Hashish EA, El-Bialy GG. Nurses' Perceptions of Safety Climate and Barriers to Report Medication Err          | 2013       | to assess nurses' perceptions of safety climate and barriers to rep   | 1. Descriptive or exploratory assess | Quantitative  | Yes     | ate scale (Blegen et al., 2005)                      |             |               |                          |              |            |
| Aboul-Fotouh AM, Ismail NA, Ez Elarab HS, Wassif GO. Assessment of patient safety culture among healthc            | 2012       | assessed healthcare providers' perceptions of patient safety cultu    | 2. Testing relationships among vari  | Quantitative  | Yes     | HSOPS                                                |             |               |                          |              |            |
| Abrahamson K, Hass Z, Morgan K, Fulton B, Ramanujam R. The Relationship Between Nurse-Reported Safe                | 2016       | The purpose of this study was to better understand the relationsh     | 2. Testing relationships among vari  | Quantitative  | Yes     | HSOPS                                                |             |               |                          |              |            |
| Abrahamson, K., F. Rong, K. Pressler, B. R. Fulton, K. H. Morgan and J. G. Anderson (2018). "Organizational        | 2018       | This article examines the impact of organizational role on percept    | 2. Testing relationships among vari  | Quantitative  | Yes     | HSOPS                                                |             |               |                          |              |            |
| Abtoss KM, Shaw BE, Owens TA, Juno JL, Commiskey EL, Niedner MF. Increasing medication error reporti               | 2011       | This study analyses patterns in reporting rates of medication erro    | 4. Evaluation of an intervention     | Quantitative  | Yes     | SAQ                                                  |             |               |                          |              |            |
| AbuAlRub RF, Abu AlHijaa EH. The impact of educational interventions on enhancing perceptions of patient           | 2014       | The purpose of this study was to examine the impact of patient sa     | 4. Evaluation of an intervention     | Quantitative  | Yes     | HSOPS                                                |             |               |                          |              |            |
| AbuAlRub RF, Gharaibeh HF, Bashayreh AEI. The Relationships Between Safety Climate, Teamwork, and Int              | 2012       | to examine the relationships among safety climate, teamwork, an       | 2. Testing relationships among vari  | Quantitative  | Yes     | SAQ                                                  |             |               |                          |              |            |
| Abu-El-Noor NI, Hamdan MA, Abu-El-Noor MK, Radwan A-KS, Alshaer AA. Safety Culture in Neonatal Inten               | 2017       | to assess the safety culture in the neonatal intensive care units (N  | 1. Descriptive or exploratory assess | Quantitative  | Yes     | SAQ                                                  |             |               |                          |              |            |
| Abu-El-Noor, N. I., M. K. Abu-El-Noor, Y. Z. Abuowda, M. Alfaqawi and B. Böttcher (2019). "Patient safety          | 2019       | This study aimed to assess attitudes of nurses working in governm     | 1. Descriptive or exploratory assess | Quantitative  | Yes     | estionnaire III (APSQ III) (Carruthers et al., 2009) |             |               |                          |              |            |
| Abuosi, A. A., A. Akologe and E. A. Anaba (2020). "Determinants of patient safety culture among healthc            | 2020       | To find out the determinants of patient safety culture among heal     | 1. Descriptive or exploratory assess | Quantitative  | Yes     | HSOPS                                                |             |               |                          |              |            |
| Adibi H, Khalesi N, Ravaghi H, Jafari M, Jeddian AR. Development of an effective risk management syst              | 2012       | The aim of this study was to develop and implement a risk manag       | 1. Descriptive or exploratory assess | Quantitative  | Yes     | HSOPS                                                |             |               |                          |              |            |
| Agnew C, Flin R, Mearns K. Patient safety climate and worker safety behaviours in acute hospitals in Scotla        | 2013       | to obtain a measure of hospital safety climate from a sample of N     | 2. Testing relationships among vari  | Quantitative  | Yes     | HSOPS                                                |             |               |                          |              |            |
| Ahmed M, Arora S, Baker P, Hayden J, Vincent C, Sevdalis N. Building capacity and capability for patient sa        | 2013       | To develop, implement and evaluate a training programme for ses       | 4. Evaluation of an intervention     | Quantitative  | Yes     | nts' Patient Safety Questionnaire                    |             |               |                          |              |            |
| Ahmed, S. M., N. Fekry and F. A. Abed (2018). "Assessment of safety climate among nurses at selected hos           | 2018       | This study aimed to assess the safety climate among staff nurses      | 1. Descriptive or exploratory assess | Quantitative  | Yes     | te Survey (Ahmed et al. 2018)                        |             |               |                          |              |            |
| Al Faqeeh, F., K. Khalid and A. Osman (2019). "Integrating safety attitudes and safety stressors into safety       | 2019       | How safety climates, safety attitudes, and safety behaviors are re    | 2. Testing relationships among vari  | Quantitative  | Yes     | l Faqeeh et al. 2019                                 |             |               |                          |              |            |
| Al Ma'mari, Q., L. A. Sharour and O. A. Omari (2019). "Predictors of perceptions of patient safety culture a       | 2019       | Predictors of perceptions of patient safety culture and frequency     | 2. Testing relationships among vari  | Quantitative  | Yes     | HSOPS                                                |             |               |                          |              |            |
| Al Nadabi, W., M. Faisal and M. A. Mohammed (2019). "Patient safety culture in Oman: A national study."            | 2019       | This study aims to measure patient safety culture across maternit     | 1. Descriptive or exploratory assess | Quantitative  | Yes     | SAQ                                                  |             |               |                          |              |            |
| Al Salem, G., P. Bowie and J. Morrison (2019). "Hospital Survey on Patient Safety Culture: psychometric ev         | 2019       | This study aims to investigate the psychometric properties of the     | 3. Methodological focus              | Quantitative  | Yes     | HSOPS                                                |             |               |                          |              |            |
| Alahmadi HA. Assessment of patient safety culture in Saudi Arabian hospitals. Quality & safety in health ca        | 2010       | The purpose of this study to evaluate the extent to which the cult    | 2. Testing relationships among vari  | Quantitative  | Yes     | HSOPS                                                |             |               |                          |              |            |
| Al-Ahmadi TA. Measuring Patient Safety Culture in Riyadh's Hospitals: A Comparison between Public and P            | 2009       | The aim of this research was to explore the perceptions of Riyadh     | 2. Testing relationships among vari  | Quantitative  | Yes     | HSOPS                                                |             |               |                          |              |            |
| Al-Awa B, Al Mazrooa A, Rayes O, et al. Benchmarking the post-accreditation patient safety culture at King         | 2012       | The objective of this study was to perform an unbiased assessme       | 2. Testing relationships among vari  | Quantitative  | Yes     | HSOPS                                                |             |               |                          |              |            |
| Alayed AS, Loof H, Johansson UB. Saudi Arabian ICU safety culture and nurses' attitudes. International jo          | 2014       | The purpose of this paper is to examine nurses' attitudes towards     | 1. Descriptive or exploratory assess | Quantitative  | Yes     | SAQ                                                  |             |               |                          |              |            |
| Al-Babtain B, Aljadhey H, Mahmoud MA, Alqaeei S, Ahmed Y. Culture of safety among nurses in a tertiary             | 2016       | To assess the culture of safety among nurses in a tertiary teachi     | 1. Descriptive or exploratory assess | Quantitative  | Yes     | SAQ                                                  |             |               |                          |              |            |
| Alemdar, D. K. and G. Yilmaz (2020). "Evaluation of the Relationship Between the Patient Safety Culture an         | 2020       | This study was conducted descriptively so as to determine the rel     | 2. Testing relationships among vari  | Quantitative  | Yes     | re Scale (PSCS) by Turkmen et al. 2011               |             |               |                          |              |            |
| Alenez, A., R. P. M. Pandaan, J. U. Almazan, I. N. Pandaan, F. S. Casison and J. P. Cruz (2019). "Clinical prac    | 2019       | To assess the perceptions of clinical practitioners regarding the di  | 1. Descriptive or exploratory assess | Quantitative  | Yes     | HSOPS                                                |             |               |                          |              |            |
| Alex Kim, R. J., Z. H. Chin, P. Sharlyn, B. Priscilla and S. Josephine (2019). "Hospital survey on patient safety  | 2019       | The purpose of this study is to assess the views and perceptions o    | 1. Descriptive or exploratory assess | Quantitative  | Yes     | HSOPS                                                |             |               |                          |              |            |
| Alharbi, W., J. Cleland and Z. Morrison (2018). "Assessment of Patient Safety Culture in an Adult Oncology         | 2018       | We sought to evaluate patient safety culture across diferent heal     | 1. Descriptive or exploratory assess | Quantitative  | Yes     | HSOPS                                                |             |               |                          |              |            |
| Ali, H., S. Z. Ibrahim, B. Al Mudaf, T. Al Fadal, D. Jamal and F. El-Jardali (2018). "Baseline assessment of       | 2018       | The article analysis patient safety culture in public hospitals in Ku | 1. Descriptive or exploratory assess | Quantitative  | Yes     | HSOPS                                                |             |               |                          |              |            |
| Aljabri, D., A. Vaughn, M. Austin, L. White, Z. Li, J. Naessens and A. Spaulding (2020). "An Investigation of      | 2020       | The purpose of this study was to evaluate the number of work inj      | 2. Testing relationships among vari  | Quantitative  | Yes     | Mercer 2019                                          |             |               |                          |              |            |
| Allard J, Bleakley A, Hobbs A, Coombes L. Pre-surgery briefings and safety climate in the operating theatre        | 2011       | To investigate whether exposure to pre-surgery briefings is relat     | 4. Evaluation of an intervention     | Quantitative  | Yes     | SAQ                                                  |             |               |                          |              |            |
| Allen S, Chiarella M, Homer CS. Lessons learned from measuring safety culture: an Australian case study. M         | 2010       | This paper reports a case study examining the safety culture in on    | 1. Descriptive or exploratory assess | Mixed methods | Yes     | Multiple - SAQ, SCS                                  | Yes         |               | Yes                      |              |            |
| Al-Mandhari A, Al-Zakwani I, Al-Kindi M, Tawilah J, Dorvlo AS, Al-Adawi S. Patient safety culture assessmen        | 2014       | To illustrate the patient safety culture in Oman as gleaned via 12    | 1. Descriptive or exploratory assess | Quantitative  | Yes     | HSOPS                                                |             |               |                          |              |            |
| Al-Mugheed, K. and N. Bayraktar (2020). "Patient safety attitudes among critical care nurses: A case study         | 2020       | this study aimed to examine patient safety attitudes among critica    | 1. Descriptive or exploratory assess | Quantitative  | Yes     | SAQ                                                  |             |               |                          |              |            |
| Almutairi AF, Gardner G, McCarthy A. Perceptions of clinical safety climate of the multicultural nursing wo        | 2013       | The purpose of this study is to explore the safety climate percepti   | 1. Descriptive or exploratory assess | Quantitative  | Yes     | SCSu                                                 |             |               |                          |              |            |
| Al-Nawafleh A, Abu-Helalah MA, Hill V, Masoud MI, Al-Mahasneh HA, Salti ETAl. Patient Safety Culture in I          | 2016       | he purpose of this study is to validate an Arabic version of the Hos  | 3. Methodological focus              | Quantitative  | Yes     | HSOPS                                                |             |               |                          |              |            |
| Alonazi NA, Alonazi AA, Saeed E, Mohamed S. The perception of safety culture among nurses in a tertiary            | 2016       | the aim of this study is to explore perceptions of patient safety an  | 1. Descriptive or exploratory assess | Quantitative  | Yes     | HSOPS                                                |             |               |                          |              |            |
| Alqattan, H., J. Cleland and Z. Morrison (2018). "An evaluation of patient safety culture in a secondary care      | 2018       | This study carried out an initial evaluation of the patient safety cu | 1. Descriptive or exploratory assess | Quantitative  | Yes     | HSOPS                                                |             |               |                          |              |            |
| Alquwez, N., J. P. Cruz, A. M. Almoghairi, R. S. Al-otaibi, K. O. Almutairi, J. G. Alicante and P. C. Colet (2018) | 2018       | To assess the present patient safety culture of three general hosp    | 1. Descriptive or exploratory assess | Quantitative  | Yes     | HSOPS                                                |             |               |                          |              |            |
| Alrowley, Z. and O. Ghazi Baker (2019). "Assessing Building Blocks for Patient Safety Culture-a Quantitati         | 2019       | The study analyzes staffs' perception of a safety culture and their   | 1. Descriptive or exploratory assess | Quantitative  | Yes     | HSOPS                                                |             |               |                          |              |            |
| Alshammari, F., E. Pasay-an, M. Albolteeh, M. H. Alshammari, T. Susanto, S. Villareal, M. C. L. Indonto and        | 2019       | The present study investigates the perceptions of healthcare prof     | 1. Descriptive or exploratory assess | Quantitative  | Yes     | HSOPS                                                |             |               |                          |              |            |
| Alshammari, M. H. (2019). "Patient safety culture of nurses in public and private hospitals in northwestern        | 2019       | This study determined the patient safety cultures of nurses in pub    | 1. Descriptive or exploratory assess | Quantitative  | Yes     | HSOPS                                                |             |               |                          |              |            |
| Alves DF, Guairadello EB. Safety climate, emotional exhaustion and job satisfaction among Brazilian paedia         | 2016       | To assess the correlation and predictive effect of emotional exha     | 2. Testing relationships among vari  | Quantitative  | Yes     | SAQ                                                  |             |               |                          |              |            |
| Alves Gómes, M. D., A. M. de Souza Fontes, A. O. Soares Monteiro Silveira and G. Sadoyama (2019). "Pat             | 2019       | The objective of this study was to evaluate the perception regard     | 1. Descriptive or exploratory assess | Quantitative  | Yes     | SAQ                                                  |             |               |                          |              |            |
| Alves, D. F. B., E. Lorenzini and A. C. B. Kolankiewicz (2020). "Patient safety climate in a Brazilian general h   | 2020       | To measure patient safety climate and the associated                  | 1. Descriptive or exploratory assess | Quantitative  | Yes     | SAQ                                                  |             |               |                          |              |            |
| Alzaharani, N., R. Jones and M. E. Abdel-Latif (2018). "Attitudes of doctors and nurses toward patient saf         | 2018       | This study aims to investigate doctors' and nurses' attitudes towa    | 1. Descriptive or exploratory assess | Quantitative  | Yes     | SAQ                                                  |             |               |                          |              |            |
| Alzaharani, N., R. Jones and M. E. Abdel-Latif (2019). "Safety Attitudes among Doctors and Nurses in an Em         | 2019       | To investigate doctors' and nurses' attitudes towards patient safe    | 1. Descriptive or exploratory assess | Quantitative  | Yes     | SAQ                                                  |             |               |                          |              |            |
| Ameryoun, A., A. H. Pakpour, M. Nikoobakht, M. Saffari, M. Yaseri, K. G. N. O'Garro and H. G. Koenig (2019)        | 2019       | This study was conducted to determine whether a 1-day educatio        | 4. Evaluation of an intervention     | Quantitative  | Yes     | SAQ                                                  |             |               |                          |              |            |
| Amiri, M., Z. Khademan and R. Nikandish (2018). "The effect of nurse empowerment educational program               | 2018       | The present study aimed to determine the effect of empowering         | 4. Evaluation of an intervention     | Quantitative  | Yes     | HSOPS                                                |             |               |                          |              |            |
| Ammouri A, Tallakh AK, Mullira JK, Geethakrishnan R, Al Kindi SN. Patient safety culture among nurses. In          | 2015       | The purpose of this study was to investigate nurses' perceptions a    | 2. Testing relationships among vari  | Quantitative  | Yes     | HSOPS                                                |             |               |                          |              |            |
| Amponsah-Tawaih K, Adu MA. Work Pressure and Safety Behaviors among Health Workers in Ghana: The                   | 2016       | the aim of the study was to examine how pressure influence safet      | 2. Testing relationships among vari  | Quantitative  | Yes     | ey (Griffin & Neal, 2000; Neal & Griffin, 2006)      |             |               |                          |              |            |
| Anbari, Z., R. Jadidi, J. Nazari, S. Amini, S. Khosravi, M. S. Koushki and T. S. J. Arani (2019). "Workforce Perc  | 2019       | This study aimed to assesses patient safety culture in Iran teachi    | 1. Descriptive or exploratory assess | Quantitative  | Yes     | HSOPS                                                |             |               |                          |              |            |

|                                                                                                                     |      |                                                                                                  |                                      |               |     |                                                |     |  |     |  |     |     |     |
|---------------------------------------------------------------------------------------------------------------------|------|--------------------------------------------------------------------------------------------------|--------------------------------------|---------------|-----|------------------------------------------------|-----|--|-----|--|-----|-----|-----|
| Ansari, S. P., M. E. Rayfield, V. A. Wallis, J. E. Jardine, E. P. Morris and E. Prosser-Snellings (2019). "A Safety | 2019 | The aim of the study was to evaluate the impact of maternity-oriented                            | 4. Evaluation of an intervention     | Quantitative  | Yes | HSOPS                                          |     |  |     |  |     |     |     |
| Artino, M., M. Sanchez-Manzanares and A. Ortega (2020). "The hospital survey on patient safety culture in           | 2020 | This study investigates the psychometric properties of the Hospital Safety Culture Survey (HSCS) | 3. Methodological focus              | Quantitative  | Yes | HSOPS                                          |     |  |     |  |     |     |     |
| Armelino D, Quinn Griffin MT, Fitzpatrick JJ. Structural empowerment and patient safety culture among re            | 2010 | The aim of the present study was to examine the relationship between                             | 2. Testing relationships among vari  | Quantitative  | Yes | HSOPS                                          |     |  |     |  |     |     |     |
| Armstrong K, Laschinger H, Wong C. Workplace Empowerment and Magnet Hospital Characteristics as Pre                 | 2009 | This study tested a theoretical model derived from Kanter's theor                                | 2. Testing relationships among vari  | Quantitative  | Yes | SCM                                            |     |  |     |  |     |     |     |
| Arnetz, J., L. E. Hamblin, S. Sudan and B. Arnetz (2018). "Organizational Determinants of Workplace Violence        | 2018 | To identify organizational factors contributing to workplace violence                            | 2. Testing relationships among vari  | Quantitative  | Yes | ation Climate (Kessler et al., 2008)           |     |  |     |  |     |     |     |
| Arrieta, A., G. Suárez, G. Hakim and G. Suárez (2018). "Assessment of patient safety culture in private and         | 2018 | To assess the patient safety culture in Peruvian hospitals from the                              | 2. Testing relationships among vari  | Quantitative  | Yes | HSOPS                                          |     |  |     |  |     |     |     |
| Auer C, Schwendimann R, Koch R, De Geest S, Ausserhofer D. How hospital leaders contribute to patient sa            | 2014 | The aim of this study was to explore the associations between hospital                           | 2. Testing relationships among vari  | Quantitative  | Yes | HSOPS                                          |     |  |     |  |     |     |     |
| Ausserhofer D, Schubert M, Desmedt M, Blegen MA, De Geest S, Schwendimann R. The association of patient             | 2013 | The purpose of this study was to explore the relationship between                                | 2. Testing relationships among vari  | Quantitative  | Yes | SOS                                            |     |  |     |  |     |     |     |
| Ausserhofer D, Schubert M, Engberg S, Blegen M, De G, Schwendimann R. Nurse-reported patient safety c               | 2012 | We aimed (1) to describe the nurse-reported engagement in safety                                 | 1. Descriptive or exploratory assess | Quantitative  | Yes | SOS                                            |     |  |     |  |     |     |     |
| Avramchuk, A. S. and S. J. J. McGuire (2018). "Patient Safety Culture: A Study of Southern California Health        | 2018 | We developed and tested a short survey instrument intended as a                                  | 3. Methodological focus              | Quantitative  | Yes | nt Safety Culture Survey (Cal-PSCS)            |     |  |     |  |     |     |     |
| Azimi L, Bahadori M. The effect of safety culture education on improvement of managers' attitudes toward            | 2012 | to measure attitudes of managers towards patients' safety before                                 | 4. Evaluation of an intervention     | Quantitative  | Yes | SAQ                                            |     |  |     |  |     |     |     |
| Babic, B., A. A. Volpe, S. Merola, E. Mauer, Y. Cozacov, C. Y. Ko, F. Michelassi and P. Saldinger (2018). "Sust     | 2018 | Patient care perception was assessed using Safety Attitudes Ques                                 | 4. Evaluation of an intervention     | Quantitative  | Yes | SAQ                                            |     |  |     |  |     |     |     |
| Bagnasco A, Tibaldi L, Chirone P, et al. Patient safety culture: an Italian experience. Journal of clinical nursi   | 2011 | To understand what level of awareness health professionals work                                  | 3. Methodological focus              | Quantitative  | Yes | HSOPS                                          |     |  |     |  |     |     |     |
| Bahar, S. and E. Önler (2020). "Turkish surgical nurses' attitudes related to patient safety: A questionnaire       | 2020 | This research aimed to evaluate the patient safety attitudes of Tur                              | 1. Descriptive or exploratory assess | Quantitative  | Yes | SAQ                                            |     |  |     |  |     |     |     |
| Bahrami MA, Chahal M, Montazerifaraj R, Dehghani Tafti A. Iranian nurses' perception of patient safety c            | 2014 | This study was aimed to survey patient safety culture in 2 Iranian                               | 1. Descriptive or exploratory assess | Quantitative  | Yes | HSOPS                                          |     |  |     |  |     |     |     |
| Ballangrud R, Hedelin B, Hall-Lord ML. Nurses' perceptions of patient safety climate in intensive care units        | 2012 | To investigate registered nurses' perceptions of the patient safety                              | 2. Testing relationships among vari  | Quantitative  | Yes | HSOPS                                          |     |  |     |  |     |     |     |
| Barbosa MH, Floriano DR, Oliveira KFD, Nascimento KGD, Ferreira LA. PATIENT SAFETY CLIMATE AT A PRIVA               | 2016 | Evaluate the patient safety climate from the perspective of the he                               | 1. Descriptive or exploratory assess | Quantitative  | Yes | SAQ                                            |     |  |     |  |     |     |     |
| Barbosa MH, Mendes Sousa E, Marques dos Santos Felix M, Faria Oliveira K, Barichello E. Patient safety cli          | 2015 | The study's objective was to assess the safety climate from the pe                               | 1. Descriptive or exploratory assess | Quantitative  | Yes | SAQ                                            |     |  |     |  |     |     |     |
| Bartončíková, D., D. Kalánková, Z. Mikšová, K. Ziačková and L. Mazalová (2019). "Patient safety culture from        | 2019 | to demonstrate a broader context in the assessment of patient sa                                 | 3. Methodological focus              | Quantitative  | Yes | HSOPS                                          |     |  |     |  |     |     |     |
| Bartončíková, D., D. Kalánková, Z. Mikšová, R. Kurucová, Š. Tomová and K. Ziačková (2019). "THE PSYCHOM             | 2019 | To analyze the psychometric properties of the Hospital Survey on                                 | 3. Methodological focus              | Quantitative  | Yes | HSOPS                                          |     |  |     |  |     |     |     |
| Basson, T., A. Montoya, J. Neely, L. Harmon and B. V. Watts (2018). "Improving Patient Safety Culture: A Re         | 2018 | The aim of the study was to improve the safety culture at a Veter                                | 4. Evaluation of an intervention     | Quantitative  | Yes | Multiple - TSCS, HSOPS                         |     |  |     |  |     |     |     |
| Basuni EM, Bayoumi MM. Improvement critical care patient safety: using nursing staff development strate             | 2015 | aimed at using staff development strategies through implementin                                  | 4. Evaluation of an intervention     | Quantitative  | Yes | SAQ                                            |     |  |     |  |     |     |     |
| Beck, M. K., M. M. Loro, V. A. Casali Bandeira, C. R. Schmidt, S. D. Pai, L. R. Bandeira and A. C. Bernat Kolan     | 2018 | This study aimed to measure the safety culture of the patient fro                                | 1. Descriptive or exploratory assess | Quantitative  | Yes | SAQ                                            |     |  |     |  |     |     |     |
| Benn J, Burnett S, Parand A, Pinto A, Vincent C. Factors predicting change in hospital safety climate and ca        | 2012 | (1) To analyze change in a survey measure of organisational patie                                | 4. Evaluation of an intervention     | Quantitative  | Yes | imate and Capability (SCC)                     |     |  |     |  |     |     |     |
| Bennett PN, Ockerby C, Stinson J, Willcocks K, Chalmers C. Measuring hospital falls prevention safety clima         | 2014 | The aim of this study was to measure the falls prevention safety c                               | 1. Descriptive or exploratory assess | Quantitative  | Yes | Safety Climate Survey (SCS)                    |     |  |     |  |     |     |     |
| Benning A, Ghaleb M, Suokas A, et al. Large scale organisational intervention to improve patient safety in          | 2011 | To conduct an independent evaluation of the first phase of the He                                | 4. Evaluation of an intervention     | Quantitative  | Yes | NHS Staff Survey                               |     |  |     |  |     |     |     |
| Benzer JK, Meterko M, Singer SJ. The patient safety climate in healthcare organizations (PSCHO) survey: SH          | 2017 | to develop a 15- to 20-item safety climate survey based on the Pa                                | 3. Methodological focus              | Quantitative  | Yes | PSCHO                                          |     |  |     |  |     |     |     |
| Berman, L, S. Rangel, A. Goldin, D. Skarda, M. Ottesen, D. Bliss, P. Valusek, M. Fallat, K. Tsao, A. Q. For the     | 2018 | The purpose of this study was to characterize the attitudes and p                                | 1. Descriptive or exploratory assess | Quantitative  | Yes | Berman et al. 2018                             |     |  |     |  |     |     |     |
| Berry JC, Davis JT, Bartman T, et al. Improved Safety Culture and Teamwork Climate Are Associated With              | 2016 | to document such an association across an entire hospital system                                 | 4. Evaluation of an intervention     | Quantitative  | Yes | SAQ                                            |     |  |     |  |     |     |     |
| Bethune R, Canter R, Abrams P. What do surgical trainees think about patient safety culture, and is this dif        | 2012 | This study surveyed both consultant and trainee views on perceiv                                 | 1. Descriptive or exploratory assess | Quantitative  | Yes | SAQ                                            |     |  |     |  |     |     |     |
| Bilal, H. and H. Y. Sari (2020). "Relationship between burnout and patient safety attitudes in pediatric nurs       | 2020 | to determine the relationship between the patient safety attitude                                | 2. Testing relationships among vari  | Quantitative  | Yes | SAQ                                            |     |  |     |  |     |     |     |
| Birk K, Padjen L, Markič M. Adverse event reporting in Slovenia – The influence of safety culture, supervi          | 2016 | The aim of this survey was to determine whether safety culture, s                                | 2. Testing relationships among vari  | Quantitative  | Yes | HSOPS                                          |     |  |     |  |     |     |     |
| Birkmeyer NJ, Finks JF, Greenberg CK, et al. Safety culture and complications after bariatric surgery. Ann S        | 2013 | To assess relationships between safety culture and complications                                 | 2. Testing relationships among vari  | Quantitative  | Yes | rk Meyer et al. 2013                           |     |  |     |  |     |     |     |
| Bishop AC, Boyle TA. The Role of Safety Culture in Influencing Provider Perceptions of Patient Safety. Jour         | 2016 | To determine how provider perceptions of safety culture influence                                | 2. Testing relationships among vari  | Quantitative  | Yes | rk Meyer et al. 2013                           |     |  |     |  |     |     |     |
| Black AA, Brauer SG, Bell RA, Economidis AJ, Haines TP. Insights into the climate of safety towards the pre         | 2011 | To explore the climate of safety towards falls prevention among f                                | 1. Descriptive or exploratory assess | Quantitative  | Yes | PSCHO                                          |     |  |     |  |     |     |     |
| Blegen, M. A., Gearhart, S., O'Brien, R., Sehgal, N. L., & Aldredge, B. K. (2009). AHRQ's hospital survey on        | 2009 | This project analyzed the psychometric properties of the Agency f                                | 3. Methodological focus              | Quantitative  | Yes | HSOPS                                          |     |  |     |  |     |     |     |
| Blegen MA, Sehgal NL, Aldredge BK, Gearhart S, Auerbach AA, Wachter RM. Republished paper: Improving                | 2010 | The goal of this project was to improve unit-based safety culture                                | 4. Evaluation of an intervention     | Quantitative  | Yes | HSOPS                                          |     |  |     |  |     |     |     |
| Boan DM, Nadzam D, Clapp JR, Jr. The Impact of Variance in Perception of the Organization on Capacity to            | 2012 | analyzed the degree of agreement in perceptions of these four gr                                 | 2. Testing relationships among vari  | Quantitative  | Yes | HSOPS                                          |     |  |     |  |     |     |     |
| Bodur S, Filiz E. Validity and reliability of Turkish version of "Hospital Survey on Patient Safety Culture" and    | 2010 | The aim of this study is threefold: to determine the validity and re                             | 3. Methodological focus              | Quantitative  | Yes | HSOPS                                          |     |  |     |  |     |     |     |
| Bognár A, Barach P, Johnson JK, et al. Errors and the Burden of Errors: Attitudes, Perceptions, and the Cult        | 2008 | We assessed the perceptions and attitudes of surgical teams relat                                | 2. Testing relationships among vari  | Quantitative  | Yes | SAQ                                            |     |  |     |  |     |     |     |
| Borji M, Molavi S, Salimi E, Bastami Y. Studying Patient Safety Culture from the Viewpoint of Nurse in educ         | 2016 | this article aims at studying the condition of patient safety culture                            | 1. Descriptive or exploratory assess | Quantitative  | Yes | HSOPS                                          |     |  |     |  |     |     |     |
| Boughaba, A., S. Aberkane, Y.-O. Fourar and M. Djebabra (2019). "Study of safety culture in healthcare ins          | 2019 | to measure safety culture dimensions in order to improve and pro                                 | 1. Descriptive or exploratory assess | Quantitative  | Yes | HSOPS                                          |     |  |     |  |     |     |     |
| Boussat, B., K. Kamalanavin and P. François (2018). "The contribution of open comments to understanding             | 2018 | to analyze the qualitative data of the comments section of a Hosp                                | 3. Methodological focus              | Mixed methods | Yes | HSOPS                                          | Yes |  |     |  |     |     |     |
| Boyer KK, Gardner JW, Schweikhart S. Process quality improvement: An examination of general vs. outcom              | 2012 | We empirically test a conceptual framework of safety culture that                                | 2. Testing relationships among vari  | Quantitative  | Yes | Boyer et al. 2012                              |     |  |     |  |     |     |     |
| Brabcova I, Bartlova S, Tothova V, Prokesova R. Selected aspects of "safety culture" in hospitals of the Cze        | 2015 | GOAL OF THE SURVEY was to assess the safety culture with regard                                  | 2. Testing relationships among vari  | Quantitative  | Yes | HSOPS                                          |     |  |     |  |     |     |     |
| Braddock CH, 3rd, Szafarski N, Forsey L, Abel L, Hernandez-Boussard T, Morton J. The TRANSFORM Patien               | 2015 | We aimed to evaluate the effects of a multifaceted, microsystem-                                 | 4. Evaluation of an intervention     | Quantitative  | Yes | HSOPS                                          |     |  |     |  |     |     |     |
| Brandis, S., S. Schleimer and J. Rice (2019). "Pixie dust". Journal of Health Organization & Management             | 2019 | to explore the concept of reflexivity and develop a model for mag                                | 2. Testing relationships among vari  | Quantitative  | Yes | SOS                                            |     |  |     |  |     |     |     |
| Brasaitė I, Kaunonen M, Martinkėnas A, Mockienė V, Suominen T. Health care professionals' skills regarding          | 2016 | to describe health care professionals' skills regarding patient safe                             | 1. Descriptive or exploratory assess | Quantitative  | Yes | Is and Knowledge (PS-AK, Schnell et al., 2008) |     |  |     |  |     |     |     |
| Brasaitė I, Kaunonen M, Martinkėnas A, Suominen T. Health care professionals' attitudes regarding patient           | 2016 | to describe health care professionals' attitudes regarding patient                               | 1. Descriptive or exploratory assess | Quantitative  | Yes | SAQ                                            |     |  |     |  |     |     |     |
| Braun BJ, Harris AD, Richards CL, et al. Does health care role and experience influence perception of safety        | 2013 | examined the association between professional role and health ca                                 | 2. Testing relationships among vari  | Quantitative  | Yes | and Infection Prevention Assessment            |     |  |     |  |     |     |     |
| Brborovic H, Brborovic O, Brumen V, Pavlekovic G, Mustajbegovic J. Are nurse presenteeism and patient sa            | 2014 | The aim of this cross-sectional study was to investigate whether n                               | 2. Testing relationships among vari  | Quantitative  | Yes | HSOPS                                          |     |  |     |  |     |     |     |
| Brborovic H, Sklebar I, Brborovic O, Brumen V, Mustajbegovic J. Development of a Croatian version of the            | 2014 | Our aim was to determine if all 12 dimensions of the US HSOPSCV                                  | 3. Methodological focus              | Quantitative  | Yes | HSOPS                                          |     |  |     |  |     |     |     |
| Brborović, O., H. Brborović, I. A. Nola and M. Milošević (2019). "Culture of blame—an ongoing burden for            | 2019 | Our aim was to examine the prevalence and the impact of culture                                  | 2. Testing relationships among vari  | Quantitative  | Yes | HSOPS                                          |     |  |     |  |     |     |     |
| Bredesen IM, Bjoro K, Gunningberg L, Hofoss D. Patient and organisational variables associated with medi            | 2015 | To investigate the association of ward-level differences in the odd                              | 2. Testing relationships among vari  | Quantitative  | Yes | SAQ                                            |     |  |     |  |     |     |     |
| Bressers, G., I. Wallenburg, R. Stalmeijer, M. oude Egbrink and K. Lombarts (2020). "Patient safety in pedi         | 2020 | This article draws on Habermas' distinction between 'lifeworld' an                               | 1. Descriptive or exploratory assess | Qualitative   |     |                                                | Yes |  | Yes |  | Yes | Yes | Yes |
| Brilli RJ, McCleard RE, Jr., Crandall WV, et al. A comprehensive patient safety program can significantly redu      | 2013 | To evaluate the effectiveness of a hospital-wide initiative to impro                             | 4. Evaluation of an intervention     | Quantitative  | Yes | SAQ                                            |     |  |     |  |     |     |     |
| Brown DS, Wolosin R. Safety culture relationships with hospital nursing sensitive metrics. Journal for health       | 2013 | explored linkages between staff perceptions of safety culture (SC)                               | 2. Testing relationships among vari  | Quantitative  | Yes | HSOPS                                          |     |  |     |  |     |     |     |
| Budin WC, Genaro S, O'Connor C, Contratti F. Sustainability of Improvements in Perinatal Teamwork and               | 2014 | to describe changes in perinatal nurse (n = 70) and physician (n = 4                             | 4. Evaluation of an intervention     | Quantitative  | Yes | nd Safety Climate Survey (TSCS)                |     |  |     |  |     |     |     |
| Bump GM, Calabria J, Gosman G, et al. Evaluating the Clinical Learning Environment: Resident and Fellow             | 2015 | We sought to address the dearth of metrics that assess trainee pa                                | 1. Descriptive or exploratory assess | Quantitative  | Yes | HSOPS                                          |     |  |     |  |     |     |     |



|                                                                                                                 |      |                                                                         |                                      |               |     |                                            |     |     |     |     |  |
|-----------------------------------------------------------------------------------------------------------------|------|-------------------------------------------------------------------------|--------------------------------------|---------------|-----|--------------------------------------------|-----|-----|-----|-----|--|
| Doram K, Chadwick W, Bokovoy J, Profit J, Sexton JD, Sexton JB. Got spirit? The spiritual climate scale, psy    | 2017 | Our objective was to describe a novel survey scale for evaluating       | 2. Testing relationships among vari  | Quantitative  | Yes | SAQ                                        |     |     |     |     |  |
| Dorigan, G. H. and E. B. Guirardello (2018). "Effect of the practice environment of nurses on job outcomes      | 2018 | to propose and analyze a theoretical model to measure the effect        | 2. Testing relationships among vari  | Quantitative  | Yes | SAQ                                        |     |     |     |     |  |
| dos Santos Alves DF, da Silva D, Guirardello EB. Nursing practice environment, job outcomes and safety c        | 2017 | To assess correlations between the characteristics of the nursing       | 2. Testing relationships among vari  | Quantitative  | Yes | SAQ                                        |     |     |     |     |  |
| Durani P, Dias J, Singh HP, Taub N. Junior doctors and patient safety: evaluating knowledge, attitudes and      | 2013 | The Junior Doctor-Patient Safety Attitudes and Climate Questionn        | 1. Descriptive or exploratory assess | Quantitative  | Yes | afety Attitudes and Climate Questionnaire, |     |     |     |     |  |
| Durgun, H. and H. Kaya (2018). "The attitudes of emergency department nurses towards patient safety." I         | 2018 | This research was planned to identify the attitudes of emergency        | 1. Descriptive or exploratory assess | Quantitative  | Yes | SAQ                                        |     |     |     |     |  |
| Dwyer, L., A. Smith, R. McDermott, C. Breatnach, A. El-Khuffash and J. D. Corcoran (2018). "Staff Attitudes     | 2018 | There is little published research evaluating attitudes towards pat     | 1. Descriptive or exploratory assess | Quantitative  | Yes | SAQ                                        |     |     |     |     |  |
| Edwards PJ, Scott T, Richardson P, et al. Using staff perceptions on patient safety as a tool for improving sa  | 2008 | This article presents a case study highlighting a pediatric health ca   | 4. Evaluation of an intervention     | Quantitative  | Yes | HSOPS                                      |     |     |     |     |  |
| Edwards, M. T. (2018). "An Assessment of the Impact of Just Culture on Quality and Safety in US Hospitals       | 2018 | In pursuit of high reliability, numerous organizations have promot      | 2. Testing relationships among vari  | Quantitative  | Yes | HSOPS                                      |     |     |     |     |  |
| Ege, Y., D. Kilic and E. Yildiz (2019). "Patient Safety Culture: Evaluating Turkish Nurses' Attitudes and Know  | 2019 | The research was planned with the purpose to determine the per          | 1. Descriptive or exploratory assess | Quantitative  | Yes | HSOPS                                      |     |     |     |     |  |
| Eiras M, Escoval A, Grillo IM, Silva-Fortes C. The hospital survey on patient safety culture in Portuguese ho   | 2014 | The study aims to determine the AHRQ Hospital Survey on Patien          | 3. Methodological focus              | Quantitative  | Yes | HSOPS                                      |     |     |     |     |  |
| Elder NC, Brungs SM, Nagy M, Kudel J, Render ML. Intensive care unit nurses' perceptions of safety after a      | 2008 | To explore perceptions of patient safety among nursing staff in IC      | 1. Descriptive or exploratory assess | Mixed methods | Yes | HSOPS                                      |     | Yes | Yes |     |  |
| El-Jardali F, Dimassi H, Jamal D, Jaafar M, Hemadeh N. Predictors and outcomes of patient safety culture in     | 2010 | assessed the culture of safety in Lebanese hospitals.                   | 1. Descriptive or exploratory assess | Quantitative  | Yes | HSOPS                                      |     |     |     |     |  |
| El-Jardali F, Jaafar M, Dimassi H, Jamal D, Hamdan R. The current state of patient safety culture in Lebanes    | 2010 | The objective of this study is to conduct a baseline assessment of      | 1. Descriptive or exploratory assess | Quantitative  | Yes | HSOPS                                      |     |     |     |     |  |
| El-Jardali F, Sheikh F, Garcia NA, Jamal D, Abdo A. Patient safety culture in a large teaching hospital in Riya | 2014 | this paper details the findings of a baseline assessment of the pat     | 1. Descriptive or exploratory assess | Quantitative  | Yes | HSOPS                                      |     |     |     |     |  |
| El-Sherbiny, N. A., E. H. Ibrahim and W. Y. Abdel-Wahed (2020). "Assessment of patient safety culture am        | 2020 | to assess patient safety culture among paramedical health emplo         | 1. Descriptive or exploratory assess | Quantitative  | Yes | HSOPS                                      |     |     |     |     |  |
| Elsous A, Akbari Sari A, Aljeesh Y, Radwan M. Nursing perceptions of patient safety climate in the Gaza Str     | 2017 | This study was undertaken to assess the perception of nurses abo        | 1. Descriptive or exploratory assess | Quantitative  | Yes | SAQ                                        |     |     |     |     |  |
| Elsous A, Akbarisari A, Rashidian A, Aljeesh Y, Radwan M, Zaydeh HA. Psychometric Properties of an Arabic       | 2017 | This study was done to determine the reliability and validity of th     | 3. Methodological focus              | Quantitative  | Yes | SAQ                                        |     |     |     |     |  |
| Emanuela Fontenele Lima de Carvalho R, De Bortoli Cassiani SH. Cross-cultural adaptation of the Safety At       | 2012 | The objective of this study was to perform a cross-cultural adapta      | 3. Methodological focus              | Quantitative  | Yes | SAQ                                        |     |     |     |     |  |
| Erestam S, Haglund E, Bock D, Andersson AE, Angenete E. Changes in safety climate and teamwork in the o         | 2017 | to evaluate the safety climate in a Swedish operating room setting      | 4. Evaluation of an intervention     | Quantitative  | Yes | SAQ                                        |     |     |     |     |  |
| Etcheagaray JM, Thomas EJ. Comparing two safety culture surveys: safety attitudes questionnaire and hosp        | 2012 | to examine the reliability and predictive validity of two patient saf   | 3. Methodological focus              | Quantitative  | Yes | ultiple - SAQ, HSOPS                       |     |     |     |     |  |
| Etcheagaray JM, Thomas EJ. Engaging Employees: The Importance of High-Performance Work Systems for              | 2015 | To develop and test survey items that measure high-performance          | 2. Testing relationships among vari  | Quantitative  | Yes | SAQ                                        |     |     |     |     |  |
| Fan CJ, Pawlik TM, Daniels T, et al. Association of Safety Culture with Surgical Site Infection Outcomes. Jou   | 2016 | to evaluate the association between safety culture and surgical sit     | 2. Testing relationships among vari  | Quantitative  | Yes | HSOPS                                      |     |     |     |     |  |
| Farag A, Blegem M, Gedney-Lose A, Lose D, Perkhounkova Y. Voluntary Medication Error Reporting by ED            | 2017 | The purpose of this study was to examine the relationship among         | 2. Testing relationships among vari  | Quantitative  | Yes | own - improper citation                    |     |     |     |     |  |
| Farup PG. Are measurements of patient safety culture and adverse events valid and reliable? Results from        | 2015 | explored associations between the patient safety culture and adv        | 3. Methodological focus              | Quantitative  | Yes | HSOPS                                      |     |     |     |     |  |
| Fassarella, C. S., F. G. Camerini, D. M. Henrique, L. F. Almeida and M. D. C. B. Figueiredo (2018). "Evaluatio  | 2018 | To conduct a benchmarking comparison of the composites of pati          | 1. Descriptive or exploratory assess | Quantitative  | Yes | HSOPS                                      |     |     |     |     |  |
| Fassarella, C. S., L. D. da Silva, F. G. Camerini and M. D. C. Aguiar Barbieri Figueiredo (2019). "Nurse safety | 2019 | To evaluate nurse safety culture in a teaching hospital, as well as     | 1. Descriptive or exploratory assess | Quantitative  | Yes | HSOPS                                      |     |     |     |     |  |
| Feldman, S. S., S. Buchalter, D. Zink, D. J. Slovensky and L. W. Hayes (2019). "Training leaders for a culture  | 2019 | The purpose of this paper is to understand the degree to which a        | 4. Evaluation of an intervention     | Quantitative  | Yes | SAQ                                        |     |     |     |     |  |
| Feng X, Bobay K, Krejci JW, McCormick BL. Factors associated with nurses' perceptions of patient safety cu      | 2012 | To explore nurses' perceptions of patient safety culture and facto      | 2. Testing relationships among vari  | Quantitative  | Yes | HSOPS                                      |     |     |     |     |  |
| Feng XQ, Acord L, Cheng YJ, Zeng JH, Song JP. The relationship between management safety commitment             | 2011 | to explore the relationship between management safety commitme          | 2. Testing relationships among vari  | Quantitative  | Yes | HSOPS                                      |     |     |     |     |  |
| Fermo VC, Radunz V, da Rosa LM, Marinho MM. Patient safety culture in a bone marrow transplantation u           | 2015 | evaluate the patient safety culture in the perspective of health p      | 1. Descriptive or exploratory assess | Quantitative  | Yes | SAQ                                        |     |     |     |     |  |
| Fermo VC, Radunz V, Rosa LM, Marinho MM. Professional attitudes toward patient safety culture in a bon          | 2016 | To identify the attitude of health professionals toward the patient     | 1. Descriptive or exploratory assess | Quantitative  | Yes | SAQ                                        |     |     |     |     |  |
| Ferrer, M., R. Santa, A. Medhekar, E. Calvo and L. P. Molina-Sánchez (2018). "Drivers of hospital safety cult   | 2018 | The objective of this study is to identify the elements that contrib    | 2. Testing relationships among vari  | Quantitative  | Yes | Ferrer et al. 2018                         |     |     |     |     |  |
| Fontenele Lima de Carvalho RE, Arruda LP, Pinheiro do Nascimento NK, Sampaio RL, Nunes Cavalcante ML            | 2017 | to assess the culture of safety in three public hospitals.              | 1. Descriptive or exploratory assess | Quantitative  | Yes | SAQ                                        |     |     |     |     |  |
| Ford EW, Silveira GA, Kazley AS, Diana ML, Huerta TR. Assessing the relationship between patient safety cu      | 2016 | the purpose of this paper is to explore the relationship between h      | 2. Testing relationships among vari  | Quantitative  | Yes | HSOPS                                      |     |     |     |     |  |
| France DJ, Greedy RA, Jr., Liu X, et al. Measuring and Comparing Safety Climate in Intensive Care Units. Me     | 2010 | To measure safety climate in intensive care units (ICU) owned by        | 3. Methodological focus              | Quantitative  | Yes | SAQ                                        |     |     |     |     |  |
| Frankel A, Grillo SP, Pittman M, et al. Revealing and resolving patient safety defects: the impact of leaders'  | 2008 | to evaluate the impact of rigorous WalkRounds on frontline care         | 4. Evaluation of an intervention     | Quantitative  | Yes | SAQ                                        |     |     |     |     |  |
| Friganovic, A., S. Rezić, B. Kurtović, S. Vidmanic, R. Zelenikova, C. Rotim, V. Konjevoda, B. Rezek and S. Pisk | 2020 | To examine Croatian nurses' perception of implicit nursing care r       | 2. Testing relationships among vari  | Quantitative  | Yes | HSOPS                                      |     |     |     |     |  |
| Fujita S, Seto K, Ito S, Wu Y, Huang CC, Hasegawa T. The characteristics of patient safety culture in Japan,    | 2013 | The aim of this study is to investigate the characteristics of PSC in   | 1. Descriptive or exploratory assess | Quantitative  | Yes | HSOPS                                      |     |     |     |     |  |
| Fujita S, Seto K, Kitazawa T, Matsumoto K, Hasegawa T. Characteristics of unit-level patient safety culture     | 2014 | to clarify the characteristics of unit-level PSC in hospitals in Japan. | 1. Descriptive or exploratory assess | Quantitative  | Yes | HSOPS                                      |     |     |     |     |  |
| Fujita, S., Y. Wu, S. Iida, Y. Nagai, Y. Shimamori and T. Hasegawa (2019). "Patient safety management syste     | 2019 | This study aimed to identify hospital-level elements related to pat     | 2. Testing relationships among vari  | Quantitative  | Yes | HSOPS                                      |     |     |     |     |  |
| Gaber MA. Relationship among nurses' safety compliance, organizational safety climate, worker's variable        | 2013 | to explore relationship among nurses' safety compliance, organiz        | 2. Testing relationships among vari  | Quantitative  | Yes | HSCS                                       |     |     |     |     |  |
| Gabrani A, Hoxha A, Simaku A, Gabrani JC. Application of the Safety Attitudes Questionnaire (SAQ) in Alba       | 2015 | To establish the reliability and validity of the translated version o   | 3. Methodological focus              | Quantitative  | Yes | SAQ                                        |     |     |     |     |  |
| Gadjrad, P. S. and B. S. Harhangi (2019). "Safety Culture and Attitudes Among Spine Professionals: Results      | 2019 | The aim of the current study is to assess attitudes toward safety c     | 1. Descriptive or exploratory assess | Quantitative  | Yes | SAQ                                        |     |     |     |     |  |
| Galvao, T. F., M. C. Couteiro Lopes, C. C. Carrilho Oliva, M. E. de Almeida Araujo and M. T. Silva (2018). "Pa  | 2018 | to assess patient safety culture in a university hospital.              | 1. Descriptive or exploratory assess | Quantitative  | Yes | HSOPS                                      |     |     |     |     |  |
| Gambashidze, N., A. Hammer, N. Ernstmann and T. Manser (2020). "Psychometric properties of the Georg            | 2020 | To study the psychometric properties of the Georgian version of         | 3. Methodological focus              | Quantitative  | Yes | SAQ                                        |     |     |     |     |  |
| Gampetro, P. J., J. P. Segvich, N. Jordan, B. Velsor-Friedrich and L. Burkhart (2019). "Perceptions of Pediatr  | 2019 | Strategies that identify gaps in hospital's safety culture within the   | 1. Descriptive or exploratory assess | Quantitative  | Yes | HSOPS                                      |     |     |     |     |  |
| Garcia, C. d. L., I. M. Pinheiro Bezerra, J. L. Souza Ramos, J. E. T. Mendes Rossette do Valle, M. L. Bezerra d | 2019 | To analyze the relationship between patient safety culture and bu       | 2. Testing relationships among vari  | Quantitative  | Yes | HSOPS                                      |     |     |     |     |  |
| Garrouste-Orgeas M, Perrin M, Soufir L, et al. The latroref study: medical errors are associated with sympt     | 2015 | evaluated whether burnout, symptoms of depression and safety cu         | 2. Testing relationships among vari  | Quantitative  | Yes | SAQ                                        |     |     |     |     |  |
| Gehring K, Mascherek AC, Bezzola P, Schwappach DL. Safety climate in Swiss hospital units: Swiss version        | 2015 | we translated the Safety Climate Survey into German and French.         | 3. Methodological focus              | Quantitative  | Yes | SCSu                                       |     |     |     |     |  |
| Geraghty, A., Reid, S., & McIlhenny, C. (2014). Examining patient safety attitudes among urology trainees.      | 2014 | Examining patient safety attitudes among urology trainees               | 1. Descriptive or exploratory assess | Quantitative  | Yes | ORMAQ                                      |     |     |     |     |  |
| Gibbs, K., S. DeMaria, S. McKinsey, A. Fede, A. Harrington, D. Hutchison, C. Torchon, A. Levine and A. Gold     | 2018 | To describe the successful implementation of an in situ simulation      | 4. Evaluation of an intervention     | Quantitative  | Yes | Gibbs et al. 2018                          |     |     |     |     |  |
| Gillespie BM, Gwinner K, Chaboyer W, Fairweather N. Team communications in surgery - creating a culture         | 2013 | to describe team communication and the ways it fostered or thre         | 2. Testing relationships among vari  | Qualitative   |     |                                            | Yes |     |     | Yes |  |
| Gillespie, B. M., E. Harbeck, E. Kang, C. Steel, N. Fairweather and W. Chaboyer (2018). "Changes in surgical    | 2018 | The aim of the present study was to describe process changes in s       | 4. Evaluation of an intervention     | Quantitative  | Yes | nd Safety Climate Survey (TSCS)            |     |     |     |     |  |
| Giannes FR, Torrieri MC, Gabriel CS, et al. Applying an ecological restoration approach to study patient sa     | 2016 | To gain an understanding of medication safety culture and other         | 1. Descriptive or exploratory assess | Qualitative   |     |                                            |     | Yes |     | Yes |  |
| Ginsburg L, Gilin D, Tregunno D, Norton PG, Flemons W, Fleming M. Advancing measurement of patient sa           | 2009 | To examine the psychometric and unit of analysis/strength of cult       | 3. Methodological focus              | Quantitative  | Yes | MSI                                        |     |     |     |     |  |
| Ginsburg LR, Tregunno D, Norton PG, Mitchell JJ, Howley H. "Not another safety culture survey": using the       | 2014 | This study examines the revised Canadian PSCS (Can-PSCS) for use        | 3. Methodological focus              | Quantitative  | Yes | CAN PSCS                                   |     |     |     |     |  |
| Gleeson, L. L., L. Tobin, G. L. O'Brien, E. K. Crowley, A. Delaney, D. O'Mahony and S. Byrne (2020). "Safety    | 2020 | The aim of this study is to describe the safety culture of a universi   | 1. Descriptive or exploratory assess | Quantitative  | Yes | SAQ                                        |     |     |     |     |  |
| Godinho Rigobello MC, Fontenele Lima de Carvalho RE, De Bortoli Cassiani SH, Galon T, Capucho HC, de D          | 2012 | To evaluate the perception of the safety climate of nursing profes      | 1. Descriptive or exploratory assess | Quantitative  | Yes | SAQ                                        |     |     |     |     |  |
| Goldstein DH, Nyce JM, Van Den Kerkhof EG. Safety Perceptions of Health Care Leaders in 2 Canadian Acad         | 2017 | The purpose of this study was to examine the safety climate from        | 1. Descriptive or exploratory assess | Quantitative  | Yes | PSCHO                                      |     |     |     |     |  |

|                                                                                                                 |      |                                                                       |                                      |              |     |                                                 |     |  |  |  |
|-----------------------------------------------------------------------------------------------------------------|------|-----------------------------------------------------------------------|--------------------------------------|--------------|-----|-------------------------------------------------|-----|--|--|--|
| Golle, L., D. Ciotti, G. E. Gehrke Herr, F. Aozane, C. R. Schmidt and A. C. Bernat Kolankiewicz (2018). "Cultu  | 2018 | To evaluate the perception of active nurses in a private hospital a   | 1. Descriptive or exploratory assess | Quantitative | Yes | SAQ                                             |     |  |  |  |
| Goras C, Wallentin FY, Nilsson U, Ehrenberg A. Swedish translation and psychometric testing of the safety       | 2013 | The aim of the present study was to establish the validity and reli   | 3. Methodological focus              | Quantitative | Yes | SAQ                                             |     |  |  |  |
| Gordon BM, Lam TS, Bahjri K, Hashmi A, Kuhn MA. Utility of Preprocedure Checklists in the Congenital Car        | 2014 | to create, implement, and evaluate a preprocedural meeting in th      | 3. Methodological focus              | Quantitative | Yes | SAQ                                             |     |  |  |  |
| Gore DC, Powell JM, Baer JG, et al. Crew resource management improved perception of patient safety in th        | 2010 | To improve safety in the operating theater, a company of aviation     | 4. Evaluation of an intervention     | Quantitative | Yes | HSOPS                                           |     |  |  |  |
| Granel, N., J. M. Manresa-Dominguez, A. Barth, K. Papp and M. D. Bernabeu-Tamayo (2019). "Patient safet         | 2019 | The purpose of this paper is to develop a cross-cultural HSOPFC       | 3. Methodological focus              | Quantitative | Yes | HSOPS                                           |     |  |  |  |
| Groves PS, Finfgeld-Connett D, Wakefield BJ. It's always something: hospital nurses managing risk. Clinical     | 2014 | to describe the process by which hospital staff nurses keep patien    | 1. Descriptive or exploratory assess | Qualitative  |     |                                                 | Yes |  |  |  |
| Gu X, Itoh K. A cross-national study on healthcare safety climate and staff attitudes to disclosing adverse e   | 2010 | The present paper reports comparative results of safety climate in    | 1. Descriptive or exploratory assess | Quantitative | Yes | ORMAQ                                           |     |  |  |  |
| Gu X, Itoh K. A pilot study on safety climate in Chinese hospital. J Patient Saf. 2011;7(4):204-212. OBJECTIV   | 2011 | The present paper has 2 primary objectives as a pilot study on hea    | 3. Methodological focus              | Quantitative | Yes | ORMAQ                                           |     |  |  |  |
| Gunes UY, Gurlek O, Sonmez M. A survey of the patient safety culture of hospital nurses in Turkey. Collegi      | 2016 | to explore and describe nurses' perceptions of patient safety cult    | 1. Descriptive or exploratory assess | Quantitative | Yes | HSOPS                                           |     |  |  |  |
| Gupta B, Guleria K, Arora R. Patient Safety in Obstetrics and Gynecology Departments of two Teaching Hos        | 2016 | The objective of this study was to assess and compare patient saf     | 1. Descriptive or exploratory assess | Quantitative | Yes | HSOPS                                           |     |  |  |  |
| Gurková, E., R. Zeleniková, A. Friganovic, I. Uchmanovicz, D. Jarošová, E. Papastavrou and K. Žiaková (201      | 2019 | The aim of the study was to investigate nurses' perceptions of the    | 1. Descriptive or exploratory assess | Quantitative | Yes | HSOPS                                           |     |  |  |  |
| Hababbeh, A. A. and M. A. Alkhalaleh (2020). "Effect of an educational programme on the attitudes toward        | 2020 | The purpose of this study was to evaluate the effect of a surgical    | 4. Evaluation of an intervention     | Quantitative | Yes | SAQ                                             |     |  |  |  |
| Habibi M, Fesharaki MG, Samadinia H, Mohamadian M, Anvari S. Patient Safety Culture and Factors that In         | 2017 | The present study aimed to examine patient safety culture and fa      | 2. Testing relationships among vari  | Quantitative | Yes | HSOPS                                           |     |  |  |  |
| Haerksen MH, van Leeuwen W, Sexton JB, Pickkers P, van der Hoeven JG. Validation of the Dutch language          | 2016 | The objective of this study was to assess the psychometric proper     | 3. Methodological focus              | Quantitative | Yes | SAQ                                             |     |  |  |  |
| Haerksen MHTM, Kox M, Noe PM, van der Hoeven JG, Pickkers P. Crew Resource Management in the trauma             | 2017 | We determined the effects of CRM implementation in the trauma         | 4. Evaluation of an intervention     | Quantitative | Yes | SAQ                                             |     |  |  |  |
| Hahn SE, Murphy LR. A short scale for measuring safety climate. Safety Science. 2008;46(7):1047-1066. A         | 2008 | A 6-item measure that assesses global work safety climate was va      | 3. Methodological focus              | Quantitative | Yes | ahn & Murphy, 2008                              |     |  |  |  |
| Halbesleben JR, Wakefield BJ, Wakefield DS, Cooper LB. Nurse burnout and patient safety outcomes: nurse         | 2008 | the relationship between nurse burnout and patient safety indica      | 2. Testing relationships among vari  | Quantitative | Yes | HSOPS                                           |     |  |  |  |
| Haller G, Garnerin P, Morales M-A, et al. Effect of crew resource management training in a multidisciplina      | 2008 | To assess the effect of a Crew Resource Management (CRM) Inter        | 4. Evaluation of an intervention     | Quantitative | Yes | SAQ                                             |     |  |  |  |
| Hamaideh SH. Mental health nurses' perceptions of patient safety culture in psychiatric settings. Internat      | 2016 | The aims of this study were to assess the perception of mental he     | 2. Testing relationships among vari  | Quantitative | Yes | HSOPS                                           |     |  |  |  |
| Hamdan M, Saleem AA. Assessment of patient safety culture in Palestinian public hospitals. Int J Qual Heal      | 2013 | To assess the prevalent patient safety culture in Palestinian public  | 1. Descriptive or exploratory assess | Quantitative | Yes | HSOPS                                           |     |  |  |  |
| Hamdan M. Measuring safety culture in Palestinian neonatal intensive care units using the Safety Attitude       | 2013 | This study aimed to measure safety culture, examine variations ar     | 1. Descriptive or exploratory assess | Quantitative | Yes | SAQ                                             |     |  |  |  |
| Hamdan, M. and A. A. o. Saleem (2018). "Changes in Patient Safety Culture in Palestinian Public Hospitals:      | 2018 | To assess the changes in the patient safety culture between 2011      | 4. Evaluation of an intervention     | Quantitative | Yes | HSOPS                                           |     |  |  |  |
| Hammer A, Ernstmann N, Ommen O, et al. Psychometric properties of the Hospital Survey on Patient Safet          | 2011 | examines whether the Hospital Survey on Patient Safety Culture f      | 3. Methodological focus              | Quantitative | Yes | HSOPS                                           |     |  |  |  |
| Hanifi, N., Z. Yazdanshenas, M. Namadian and N. Motamed (2018). "The Effect of Patient Safety Education         | 2018 | to determine the effect of the patient safety education program o     | 4. Evaluation of an intervention     | Quantitative | Yes | HSOPS                                           |     |  |  |  |
| Hansen LO, Williams MV, Singer SI. Perceptions of hospital safety climate and incidence of readmission. H       | 2011 | To define the relationship between hospital patient safety climate    | 2. Testing relationships among vari  | Quantitative | Yes | PSCHO                                           |     |  |  |  |
| Hanskamp-Sebreghs, M., M. Zegers, G. P. Westert, W. Boeijen, S. Teerenstra, P. J. van Gorp and H. Wolters       | 2019 | To evaluate the effectiveness of internal auditing in hospital care   | 4. Evaluation of an intervention     | Quantitative | Yes | HSOPS                                           |     |  |  |  |
| Harsul, W., A. M. Irwan and E. L. Sjattar (2019). "The relationship between nurse self-efficacy and the cult    | 2019 | The aim of this study was to analyze the relationship of self-effic   | 2. Testing relationships among vari  | Quantitative | Yes | HSOPS                                           |     |  |  |  |
| Hartmann CW, Meterko M, Rosen AK, et al. Relationship of hospital organizational culture to patient safet       | 2009 | assessed the relationship between hospitals' organizational cultur    | 2. Testing relationships among vari  | Quantitative | Yes | PSCHO                                           |     |  |  |  |
| Hartmann CW, Rosen AK, Meterko M, et al. An overview of patient safety climate in the VA. Health Serv R         | 2008 | To assess variation in safety climate across VA hospitals nationally  | 2. Testing relationships among vari  | Quantitative | Yes | PSCHO                                           |     |  |  |  |
| Hatam N, Keshkar V, Ferozan F, Peivand B. Patient safety culture status in teaching hospitals: A case of s      | 2012 | Patient safety culture status in teaching hospitals: A case of shiraz | 1. Descriptive or exploratory assess | Quantitative | Yes | HSOPS                                           |     |  |  |  |
| Hatoun J, Suen W, Liu C, et al. Elucidating Reasons for Resident Underutilization of Electronic Adverse E       | 2016 | Residents at an academic medical center were surveyed about AE        | 2. Testing relationships among vari  | Quantitative | Yes | Hatoun et al. 2016                              |     |  |  |  |
| Haugen AS, Softeland E, Eide GE, et al. Impact of the World Health Organization's Surgical Safety Checklist     | 2013 | to study the checklist effects on safety culture perceptions in ope   | 4. Evaluation of an intervention     | Quantitative | Yes | HSOPS                                           |     |  |  |  |
| Haugen AS, Softeland E, Eide GE, Nortvedt MW, Aase K, Harthug S. Patient safety in surgical environmen          | 2010 | examined the psychometric properties of a Norwegian translation       | 3. Methodological focus              | Quantitative | Yes | HSOPS                                           |     |  |  |  |
| Hayashi, R., S. Fujita, S. Iida, Y. Nagai, Y. Shimamori and T. Hasegawa (2020). "Relationship of patient saf    | 2020 | This study aimed to examine the relationship between patient saf      | 2. Testing relationships among vari  | Quantitative | Yes | HSOPS                                           |     |  |  |  |
| Hayes LW, Dobyns EL, DiGiovine B, et al. A multicenter collaborative approach to reducing pediatric codes       | 2012 | The Child Health Corporation of America formed a multicenter co       | 4. Evaluation of an intervention     | Quantitative | Yes | HSOPS                                           |     |  |  |  |
| Haynes AB, Weiser TG, Berry WR, et al. Changes in safety attitude and relationship to decreased postoper        | 2011 | To assess the relationship between changes in clinician attitude a    | 4. Evaluation of an intervention     | Quantitative | Yes | SAQ                                             |     |  |  |  |
| Hedskold M, Pukk-Harenstam K, Berg E, et al. Psychometric properties of the Hospital Survey on Patient Sa       | 2013 | describes this Swedish version and an assessment of its psychome      | 3. Methodological focus              | Quantitative | Yes | HSOPS                                           |     |  |  |  |
| Hefner JL, Hilligoss B, Knupp A, et al. Cultural Transformation After Implementation of Crew Resource Man       | 2016 | examined the impact of a systematic CRM implementation across         | 4. Evaluation of an intervention     | Quantitative | Yes | HSOPS                                           |     |  |  |  |
| Hellings J, Schrooten W, Klazinga NS, Vleugels A. Improving patient safety culture. International journal of    | 2010 | to describe a patient safety culture improvement approach in five     | 4. Evaluation of an intervention     | Quantitative | Yes | HSOPS                                           |     |  |  |  |
| Hemmat F, Atashzadeh-Shoorideh F, Mehrabi T, Zayeri F. A survey of nurses' awareness of patient safety c        | 2015 | describes the nurses' awareness of patient safety culture in neona    | 1. Descriptive or exploratory assess | Quantitative | Yes | HSOPS                                           |     |  |  |  |
| Herrington, C. R. and M. W. Hand (2019). "Impact of Nurse Peer Review on a Culture of Safety." Journal          | 2019 | A pre- and postdesign using the Agency for Healthcare Research a      | 4. Evaluation of an intervention     | Quantitative | Yes | HSOPS                                           |     |  |  |  |
| Hessels AJ, Genovese-Schek V, Agarwal M, Wurmser T, Larson EL. Relationship between patient safety clim         | 2016 | This study aim was to explore the relationships among safety clim     | 2. Testing relationships among vari  | Quantitative | Yes | HSOPS                                           |     |  |  |  |
| Hessels, A. J., M. Paliwal, S. H. Weaver, D. Siddiqui and T. A. Wurmser (2019). "Impact of Patient Safety Cul   | 2019 | The purpose of this study was to describe relationships among PS      | 2. Testing relationships among vari  | Quantitative | Yes | HSOPS                                           |     |  |  |  |
| Hill MR, Roberts MJ, Alderson ML, Gale TC. Safety culture and the 5 steps to safer surgery: an intervention     | 2015 | assessed the safety culture in the elective orthopaedic theatres o    | 4. Evaluation of an intervention     | Quantitative | Yes | SAQ                                             |     |  |  |  |
| Hinde T, Gale T, Anderson I, Roberts M, Sice P. A study to assess the influence of interprofessional point of   | 2016 | to assess the impact of interprofessional point of care simulation    | 4. Evaluation of an intervention     | Quantitative | Yes | nd Safety Climate Survey (TSCS)                 |     |  |  |  |
| Hong S, U Q. The reasons for Chinese nursing staff to report adverse events: a questionnaire survey. J Nurr     | 2017 | To investigate the impact of nurses' perception of patient safety c   | 2. Testing relationships among vari  | Quantitative | Yes | SAQ                                             |     |  |  |  |
| Hook JN, Boan D, Davis DE, Aten JD, Ruiz JM, Maryon T. Cultural Humility and Hospital Safety Culture. Jour      | 2016 | explore the extent to which cultural humility, which involves ope     | 2. Testing relationships among vari  | Quantitative | Yes | HSOPS                                           |     |  |  |  |
| Hori Okuyama, J. H., T. F. Galvao, M. T. L. Crozatti and M. T. Silva (2019). "Health Professionals' percep      | 2019 | To assess patient safety culture in a university hospital.            | 1. Descriptive or exploratory assess | Quantitative | Yes | HSOPS                                           |     |  |  |  |
| Horwitz SK, Horwitz IB. The effects of organizational commitment and structural empowerment on patient          | 2017 | The purpose of this paper is to investigate the relationship betwe    | 2. Testing relationships among vari  | Quantitative | Yes | PSCHO                                           |     |  |  |  |
| Hsu, Y.-J. and J. A. Marsteller (2020). "Who Applies an Intervention to Influence Cultural Attributes in a Qui  | 2020 | This study aimed to identify factors related to teams' adoption of    | 2. Testing relationships among vari  | Quantitative | Yes | SAQ                                             |     |  |  |  |
| Huang DT, Clermont G, Kong L, et al. Intensive care unit safety culture and outcomes: a US multicenter stu      | 2010 | to determine if intensive care unit (ICU) safety culture is independ  | 2. Testing relationships among vari  | Quantitative | Yes | SAQ                                             |     |  |  |  |
| Huang, C.-H., H.-H. Wu and Y.-C. Lee (2018). "The perceptions of patient safety culture: A difference betw      | 2018 | this study aims to respectively investigate the perceptions of patie  | 1. Descriptive or exploratory assess | Quantitative | Yes | new Chinese SAQ                                 |     |  |  |  |
| Huang, C.-H., H.-H. Wu, C. Y. Chou, H. Dai and Y.-C. Lee (2018). "The Perceptions of Physicians and Nurses      | 2018 | We aimed to examine physicians' and nurses' perceptions of patie      | 1. Descriptive or exploratory assess | Quantitative | Yes | new Chinese SAQ                                 |     |  |  |  |
| Huang, H.-T., C.-H. Tsai and C.-F. Wang (2019). "A Model for Promoting Occupational Safety and Health in        | 2019 | This study used an integrative approach as a starting point and co    | 2. Testing relationships among vari  | Quantitative | Yes | ey (Griffin & Neal, 2000; Neal & Griffin, 2006) |     |  |  |  |
| Hughes IC, Chang Y, Mark BA. Quality and strength of patient safety climate on medical-surgical units. Hea      | 2009 | Study purposes were to describe quality and strength of the patie     | 1. Descriptive or exploratory assess | Quantitative | Yes | (1980) safety climate scale                     |     |  |  |  |
| Hutchinson A, Young TA, Cooper KL, et al. Trends in healthcare incident reporting and relationship to safet     | 2009 | This study analyses patterns in reporting of patient safety inciden   | 2. Testing relationships among vari  | Quantitative | Yes | NHS Staff Survey                                |     |  |  |  |
| Hwang JJ, Hwang EJ. Individual and work environment characteristics associated with error occurrences in        | 2011 | To determine individual and work environment characteristics ass      | 2. Testing relationships among vari  | Quantitative | Yes | SAQ                                             |     |  |  |  |
| Hwang JI. What are hospital nurses' strengths and weaknesses in patient safety competence? Findings fro         | 2015 | To examine hospital nurses' patient safety competencies and the       | 2. Testing relationships among vari  | Quantitative | Yes | SAQ                                             |     |  |  |  |
| Hwang, J.-I., S. W. Kim and H. J. Chin (2019). "Patient Participation in Patient Safety and Its Relationships w | 2019 | This study's aim was to examine degrees of patient participation      | 2. Testing relationships among vari  | Quantitative | Yes | SCM                                             |     |  |  |  |





|                                                                                                                                                                                                                                                                                                                |                                                                                                                                                                              |                                          |               |     |                                                 |     |     |     |     |
|----------------------------------------------------------------------------------------------------------------------------------------------------------------------------------------------------------------------------------------------------------------------------------------------------------------|------------------------------------------------------------------------------------------------------------------------------------------------------------------------------|------------------------------------------|---------------|-----|-------------------------------------------------|-----|-----|-----|-----|
| Lee WC, Hung HY, Liao HH, et al. Hospital safety culture in Taiwan: a nationwide survey using Chinese version of the Hospital Safety Culture Survey (HSCS). <i>Journal of Hospital Infection</i> . 2010                                                                                                        | to verify a safety culture survey instrument in Chinese and to assess its reliability and validity                                                                           | 3. Methodological focus                  | Quantitative  | Yes | SAQ                                             |     |     |     |     |
| Lee YC, Wu HH, Hsieh WL, Weng SJ, Hsieh LP, Huang CH. Applying importance-performance analysis to patient safety culture. <i>Journal of Hospital Infection</i> . 2015                                                                                                                                          | to improve and to develop better strategies regarding patient safety culture                                                                                                 | 1. Descriptive or exploratory assessment | Quantitative  | Yes | SAQ                                             |     |     |     |     |
| Lee S, E., C. Vincent, V. S. Dahinten, L. D. Scott, C. G. Park and K. Dunn Lopez (2018). "Effects of individual nurse and hospital safety culture on patient safety outcomes." <i>Journal of Hospital Infection</i> . 2018                                                                                     | This study aimed to investigate effects of individual nurse and hospital safety culture on patient safety outcomes                                                           | 2. Testing relationships among variables | Quantitative  | Yes | HSOPS                                           |     |     |     |     |
| Lee, W.-C., S.-H. Han and H.-J. Jeong (2020). "Ensuring Taiwan patient safety culture survey is free from diffusion bias." <i>Journal of Hospital Infection</i> . 2020                                                                                                                                         | The aim of this study was to examine whether the succinct version of the HSCS is free from diffusion bias                                                                    | 3. Methodological focus                  | Quantitative  | Yes | SAQ                                             |     |     |     |     |
| Lee, Y.-C., C.-H. Huang, C.-F. Wu, H.-W. Hsueh and H.-H. Wu (2019). "A Longitudinal Study of Identifying Critical Factors Affecting Patient Safety Culture in a Teaching Hospital." <i>Journal of Hospital Infection</i> . 2019                                                                                | This study uses longitudinal data from a regional teaching hospital to identify critical factors affecting patient safety culture                                            | 1. Descriptive or exploratory assessment | Quantitative  | Yes | SAQ                                             |     |     |     |     |
| Lee, Y.-C., P.-S. Zeng, C.-H. Huang, C.-F. Wu, C.-C. Yang and H.-H. Wu (2019). "Causal Relationships of Patient Safety Culture and Patient Safety Outcomes: A Cross-sectional Study." <i>Journal of Hospital Infection</i> . 2019                                                                              | This study uses the decision-making trial and evaluation laboratory (DEMATEL) to explore the causal relationships between patient safety culture and patient safety outcomes | 2. Testing relationships among variables | Quantitative  | Yes | SAQ                                             |     |     |     |     |
| Lefebvre, G., L. Honey, K. Hines, A. Keough, C. Roye, S. Bellemare, T. D. Piscione, A. Falconer, L. Shepherd, et al. (2020). "Patient Safety Culture and Patient Safety Outcomes: A Systematic Review." <i>Journal of Hospital Infection</i> . 2020                                                            | This study implemented a quality improvement program based on patient safety culture                                                                                         | 4. Evaluation of an intervention         | Quantitative  | Yes | SCORE                                           |     |     |     |     |
| Legg JS, Aaron L, Dempsey MC. Patient safety perceptions among vascular interventional technologists. <i>Journal of Vascular Medicine and Biology</i> . 2013                                                                                                                                                   | To describe perceptions of patient safety culture (PSC) among US vascular interventional technologists                                                                       | 1. Descriptive or exploratory assessment | Quantitative  | Yes | HSOPS                                           |     |     |     |     |
| Legg JS, Dempsey MC, Aaron L. Patient Safety Perceptions Among U.S. Radiation Therapists. <i>Radiation Therapy Oncology</i> . 2013                                                                                                                                                                             | To determine the radiation therapy profession's overall values, beliefs, and attitudes regarding patient safety                                                              | 1. Descriptive or exploratory assessment | Quantitative  | Yes | HSOPS                                           |     |     |     |     |
| Li A-T. Teamwork climate and patient safety attitudes: associations among nurses and comparison with patient safety culture. <i>Journal of Hospital Infection</i> . 2013                                                                                                                                       | Teamwork climate and patient safety attitudes: associations among nurses and comparison with patient safety culture                                                          | 2. Testing relationships among variables | Quantitative  | Yes | SAQ                                             |     |     |     |     |
| Li, Y., Y. Zha, Y. Ha, M. Jiao, H. Ma, B. Teng, K. Yang, T. Sun, Q. Wu and H. Qiao (2018). "Perceptions of patient safety culture among nurses in China." <i>Journal of Hospital Infection</i> . 2018                                                                                                          | The aim of the study is to explore the perception of healthcare workers on patient safety culture                                                                            | 1. Descriptive or exploratory assessment | Quantitative  | Yes | SAQ                                             |     |     |     |     |
| Liang HY, Tang FJ, Wang TF, Lin KC, Yu S. Nurse characteristics, leadership, safety climate, emotional labour and patient safety culture. <i>Journal of Hospital Infection</i> . 2016                                                                                                                          | The aim of this study was to propose a theoretical model and apply it to patient safety culture                                                                              | 2. Testing relationships among variables | Quantitative  | Yes | SAQ                                             |     |     |     |     |
| Lim RB, Ng BB, Ng KM. Evaluation of the patient safety leadership Walkabout programme of a hospital in Singapore. <i>Journal of Hospital Infection</i> . 2014                                                                                                                                                  | We carried out an evaluation of its effectiveness in improving the patient safety culture                                                                                    | 4. Evaluation of an intervention         | Quantitative  | Yes | SAQ                                             |     |     |     |     |
| Lima de Oliveira, I. C., M. L. S. Nunes Cavalcante, S. F. Aires, R. J. Moreira de Freitas, B. V. da Silva, D. M. Fraga, L. D. M., K. A. Carson, L. H. Lubomski, E. C. Wick and J. C. Pham (2018). "Statewide Collaborative to Reduce Medication Errors in Brazil." <i>Journal of Hospital Infection</i> . 2018 | This study's purpose was to evaluate the effectiveness of the AHRQ patient safety culture survey                                                                             | 4. Evaluation of an intervention         | Quantitative  | Yes | HSOPS                                           |     |     |     |     |
| Ling L, Gomersall CD, Samy W, et al. The Effect of a Freely Available Flipped Classroom Course on Health Care Professionals' Perceptions of Patient Safety Culture. <i>Journal of Patient Safety and Quality Care</i> . 2016                                                                                   | to assess the impact of a standardized patient safety course on health care professionals' perceptions of patient safety culture                                             | 4. Evaluation of an intervention         | Quantitative  | Yes | HSOPS                                           |     |     |     |     |
| Listyowardojo TA, Nap RE, Johnson A. Variations in hospital worker perceptions of safety culture. <i>Int J Qual Health Care</i> . 2012                                                                                                                                                                         | To compare the attitudes toward and perceptions of institutional workers on patient safety culture                                                                           | 1. Descriptive or exploratory assessment | Quantitative  | Yes | owardojo et al. 2012                            |     |     |     |     |
| Listyowardojo TA, Yan X, Leyshon S, et al. (2017) A safety culture assessment by mixed methods at a public tertiary care hospital in China. <i>Journal of Hospital Infection</i> . 2017                                                                                                                        | A safety culture assessment by mixed methods at a public tertiary care hospital in China                                                                                     | 1. Descriptive or exploratory assessment | Mixed methods | Yes | SAQ                                             | Yes |     |     |     |
| Liu Y, Kalisch BJ, Zhang L, Xu J. Perception of safety culture in hospitals in China. <i>Journal of Hospital Infection</i> . 2009                                                                                                                                                                              | The safety culture in hospitals in China was investigated using a self-developed safety culture survey                                                                       | 1. Descriptive or exploratory assessment | Quantitative  | Yes | Liu et al. 2009                                 |     |     |     |     |
| Livorsi D, Knobloch MJ, Blue LA, et al. A rapid assessment of barriers and facilitators to safety culture in an acute care hospital. <i>Journal of Hospital Infection</i> . 2016                                                                                                                               | To identify opportunities for safety culture improvement in a 30-bed acute care hospital                                                                                     | 1. Descriptive or exploratory assessment | Mixed methods | Yes | HSOPS                                           | Yes |     |     |     |
| Lopez KD, Gerling GJ, Cary MP, Karak MF. Cognitive work analysis to evaluate the problem of patient falls in a hospital. <i>Journal of Hospital Infection</i> . 2010                                                                                                                                           | To identify factors in the nursing work domain that contribute to patient falls                                                                                              | 2. Testing relationships among variables | Quantitative  | Yes | HSOPS                                           |     |     |     |     |
| Lopez-Jeng, C. and S. D. Eberth (2019). "Improving Hospital Safety Culture for Falls Prevention Through Internal Communication." <i>Journal of Hospital Infection</i> . 2019                                                                                                                                   | to develop a health education program tailored to their internal communication needs                                                                                         | 4. Evaluation of an intervention         | Quantitative  | Yes | HSOPS                                           |     |     |     |     |
| Lowe G. How employee engagement matters for hospital performance. <i>Healthcare quarterly</i> (Toronto, Ont.). 2012                                                                                                                                                                                            | examines how job, work environment, management and organizational culture affect hospital performance                                                                        | 2. Testing relationships among variables | Quantitative  | Yes | Lowe, 2012                                      |     |     |     |     |
| Luiz RB, Simoes AL, Barichello E, Barbosa MH. Factors associated with the patient safety climate at a teaching hospital. <i>Journal of Hospital Infection</i> . 2015                                                                                                                                           | To investigate the association between the scores of the patient safety climate and patient safety outcomes                                                                  | 1. Descriptive or exploratory assessment | Quantitative  | Yes | SAQ                                             |     |     |     |     |
| Lyu H, Wick EC, Housman M, Freischlag JA, Makary MA. Patient satisfaction as a possible indicator of quality of care. <i>Journal of Hospital Infection</i> . 2013                                                                                                                                              | To determine whether patient satisfaction is independent from safety culture                                                                                                 | 2. Testing relationships among variables | Quantitative  | Yes | SAQ                                             |     |     |     |     |
| Macedo TR, Rocha PK, Tomazoli A, Souza S, Anders JC, Davis K. The culture of patient safety from the perspective of pediatric emergency nurses. <i>Journal of Hospital Infection</i> . 2016                                                                                                                    | To identify the patient safety culture in pediatric emergencies from the perspective of pediatric emergency nurses                                                           | 1. Descriptive or exploratory assessment | Quantitative  | Yes | HSOPS                                           |     |     |     |     |
| Magid DJ, Sullivan AF, Cleary PD, et al. The safety of emergency care systems: Results of a survey of clinicians. <i>Journal of Hospital Infection</i> . 2009                                                                                                                                                  | The purpose of this study is to assess the degree to which EDs are safe                                                                                                      | 3. Methodological focus                  | Quantitative  | Yes | Emergency Department Safety Study Survey        |     |     |     |     |
| Mahfozpour S, Mojdehkar R. ATTITUDES OF HEALTH CAREGIVERS ON TEAMWORK AND SAFETY CLIMATE IN A TERTIARY CARE HOSPITAL. <i>Journal of Hospital Infection</i> . 2010                                                                                                                                              | To study the attitudes of health caregivers on teamwork & safety climate                                                                                                     | 1. Descriptive or exploratory assessment | Quantitative  | Yes | Emergency Department Safety Study Survey        |     |     |     |     |
| Mahjoub, M., S. Ben Fredj, N. Bouafia, R. Bouriga, N. Ben Jaleb and M. Njah (2018). "Promoting safety culture in a tertiary care hospital." <i>Journal of Hospital Infection</i> . 2018                                                                                                                        | to assess and analyze the healthcare professional-patient relationship                                                                                                       | 1. Descriptive or exploratory assessment | Quantitative  | Yes | HSOPS                                           |     |     |     |     |
| Mahrous, M. S. (2018). "Patient safety culture as a quality indicator for a safe health system: Experience from a tertiary care hospital." <i>Journal of Hospital Infection</i> . 2018                                                                                                                         | This study aimed to evaluate the extent to which the culture supports patient safety                                                                                         | 1. Descriptive or exploratory assessment | Quantitative  | Yes | HSOPS                                           |     |     |     |     |
| Mallouli M, Tili MA, Aouicha W, et al. Assessing patient safety culture in Tunisian operating rooms: A multi-center study. <i>Journal of Hospital Infection</i> . 2017                                                                                                                                         | To assess the patient safety culture (PSC) in operating rooms (ORs) in Tunisia                                                                                               | 1. Descriptive or exploratory assessment | Quantitative  | Yes | HSOPS                                           |     |     |     |     |
| Manapragada, A., V. Bruck-Lee, A. H. Thompson and L. M. Heron (2019). "When safety climate is not enough: The role of patient safety culture." <i>Journal of Hospital Infection</i> . 2019                                                                                                                     | To examine the association between components of safety climate and patient safety outcomes                                                                                  | 2. Testing relationships among variables | Quantitative  | Yes | Griffin & Neal, 2000; Neal & Griffin, 2006      |     |     |     |     |
| Mantynen R, Vehviläinen-Julkunen K, Partanen P, Turunen H, Miettinen M, Kvist T. Changes in Transformational Leadership and Patient Safety Culture in a Hospital. <i>Journal of Hospital Infection</i> . 2014                                                                                                  | This paper describes the changes in transformational leadership and patient safety culture                                                                                   | 4. Evaluation of an intervention         | Quantitative  | Yes | HSOPS                                           |     |     |     |     |
| Mardon RE, Khanna K, Sorra J, Dyer N, Famolaro T. Exploring relationships between hospital patient safety culture and patient safety outcomes. <i>Journal of Hospital Infection</i> . 2010                                                                                                                     | examined relationships between the Agency for Healthcare Research and Quality's patient safety culture survey and patient safety outcomes                                    | 2. Testing relationships among variables | Quantitative  | Yes | HSOPS                                           |     |     |     |     |
| Marinho MM, Radünz V, Barbosa SdFF. Assessment of safety culture by surgical unit nursing teams. <i>Textos de Enfermagem</i> . 2014                                                                                                                                                                            | to evaluate the patient safety culture from the perspective of the nursing teams                                                                                             | 1. Descriptive or exploratory assessment | Quantitative  | Yes | SAQ                                             |     |     |     |     |
| Mark BA, Hughes LC, Belyea M, Bacon CT, Chang Y, Jones CA. Exploring organizational context and structural factors associated with patient safety culture. <i>Journal of Hospital Infection</i> . 2008                                                                                                         | To examine relationships among organizational context (characteristics) and patient safety culture                                                                           | 2. Testing relationships among variables | Quantitative  | Yes | 1980) safety climate scale                      |     |     |     |     |
| Marsteller JA, Wen M, Hsu YJ, et al. Safety Culture in Cardiac Surgical Teams: Data From Five Programs and Implications for Practice. <i>Journal of Hospital Infection</i> . 2015                                                                                                                              | We measured and described safety culture in five cardiovascular surgery programs                                                                                             | 1. Descriptive or exploratory assessment | Quantitative  | Yes | HSOPS                                           |     |     |     |     |
| Martinez W, Etcheagaray JM, Thomas EJ, et al. "Speaking up" about patient safety concerns and unprofessional behavior: A cross-sectional study of surgeons. <i>Journal of Hospital Infection</i> . 2015                                                                                                        | To develop and test the psychometric properties of two new surveys                                                                                                           | 2. Testing relationships among variables | Quantitative  | Yes | SAQ                                             |     |     |     |     |
| Martowirono K, Wagner C, Bijnen AB. Surgical residents' perceptions of patient safety climate in Dutch teaching hospitals. <i>Journal of Hospital Infection</i> . 2014                                                                                                                                         | This study aims to take a first step in validating the SCS for use among surgical residents                                                                                  | 3. Methodological focus                  | Quantitative  | Yes | SCSu                                            |     |     |     |     |
| Marzolf S, Zekarias B, Tedla K, et al. Continuing professional education in Eritrea taught by local obstetricians. <i>Journal of Hospital Infection</i> . 2015                                                                                                                                                 | evaluated a course taught by Obstetrics/Gynaecology residents of Eritrea                                                                                                     | 4. Evaluation of an intervention         | Quantitative  | Yes | SAQ                                             |     |     |     |     |
| Mascherek AC, Bezola P, Gehring K, Schwappach DLB. Effect of a two-year national quality improvement program on patient safety culture. <i>Journal of Hospital Infection</i> . 2016                                                                                                                            | The aims of the implementation program were to implement continuous improvement and patient safety culture                                                                   | 4. Evaluation of an intervention         | Quantitative  | Yes | SAQ                                             |     |     |     |     |
| Matsubara S, Hagihara A, Nobutomo K, Matsubara S, Hagihara A, Nobutomo K. Development of a patient safety culture scale. <i>Journal of Hospital Infection</i> . 2008                                                                                                                                           | To develop a Japanese scale to measure patient safety climate among healthcare workers                                                                                       | 3. Methodological focus                  | Quantitative  | Yes | atsubara et al. 2008                            |     |     |     |     |
| Mayeng LM, Wolvaardt JE. Patient safety culture in a district hospital in South Africa: An issue of quality. <i>Journal of Hospital Infection</i> . 2015                                                                                                                                                       | The study identified and analysed the factors that influence the patient safety culture                                                                                      | 1. Descriptive or exploratory assessment | Quantitative  | Yes | MapSCAT                                         |     |     |     |     |
| McCarthy SE, O'Boyle CA, O'Shaughnessy A, Walsh G. Online patient safety education programme for junior doctors. <i>Journal of Hospital Infection</i> . 2016                                                                                                                                                   | To determine whether the programme improved junior doctors' patient safety culture                                                                                           | 4. Evaluation of an intervention         | Quantitative  | Yes | patient safety climate" (Madigosky et al. 2006) |     |     |     |     |
| McCaughy D, Dellifraigne JL, McGhan G, Bruning NS. The negative effects of workplace injury and illness on patient safety culture. <i>Journal of Hospital Infection</i> . 2013                                                                                                                                 | The purpose of this study is to examine whether workplace injury and illness affect patient safety culture                                                                   | 2. Testing relationships among variables | Quantitative  | Yes | WSS, Hayes et al., 1998)                        |     |     |     |     |
| McEachan RR, Lawton RJ, O'Hara JK, et al. Developing a reliable and valid patient measure of safety in hospitals. <i>Journal of Hospital Infection</i> . 2014                                                                                                                                                  | The aim of the current study is to test the reliability and validity of a patient safety culture survey                                                                      | 2. Testing relationships among variables | Quantitative  | Yes | HSOPS                                           |     |     |     |     |
| McFadden KL, Henagan SC, Gowen CR, III. The patient safety chain: Transformational leadership's effect on patient safety culture. <i>Journal of Hospital Infection</i> . 2009                                                                                                                                  | to investigate the existence of a patient safety chain for hospitals                                                                                                         | 2. Testing relationships among variables | Quantitative  | Yes | SAQ                                             |     |     |     |     |
| McFadden KL, Stock GN, Gowen CR, 3rd. Leadership, safety climate, and continuous quality improvement: A conceptual model. <i>Journal of Hospital Infection</i> . 2014                                                                                                                                          | We present a research model that shows how transformational leadership affects patient safety culture                                                                        | 2. Testing relationships among variables | Quantitative  | Yes | SCSu                                            |     |     |     |     |
| McLaughlin N, Winograd D, Chung HR, Van de Wiele B, Martin NA. Impact of the time-out process on patient safety culture. <i>Journal of Hospital Infection</i> . 2014                                                                                                                                           | This study assessed the impact of the current protocol for the time-out process on patient safety culture                                                                    | 2. Testing relationships among variables | Quantitative  | Yes | multiple - SAQ, HSOPS                           |     |     |     |     |
| McLeroy, R. D., J. Ingersoll, P. Nielsen and J. Pampin (2020). "Implementation of Tele-Critical Care at a General Hospital." <i>Journal of Hospital Infection</i> . 2020                                                                                                                                       | Implementation of Tele-Critical Care at a General Leonard Wood Army Medical Center                                                                                           | 4. Evaluation of an intervention         | Quantitative  | Yes | SAQ                                             |     |     |     |     |
| McMullan SP, Thomas-Hawkins C, Shirey MR. Certified Registered Nurse Anesthetist Perceptions of Patient Safety Culture. <i>Journal of Hospital Infection</i> . 2017                                                                                                                                            | investigates relationships among CRNA organizational structures and patient safety culture                                                                                   | 2. Testing relationships among variables | Quantitative  | Yes | HSOPS                                           |     |     |     |     |
| Meddings J, Reichert H, Greene MT, et al. Evaluation of the association between Hospital Survey on Patient Safety Culture and patient safety outcomes. <i>Journal of Hospital Infection</i> . 2011                                                                                                             | Examine the association between hospital units' results for the Hospital Survey on Patient Safety Culture and patient safety outcomes                                        | 2. Testing relationships among variables | Quantitative  | Yes | HSOPS                                           |     |     |     |     |
| Meeks DW, Lally KP, Carrick MM, et al. Compliance with guidelines to prevent surgical site infections: As a function of patient safety culture. <i>Journal of Hospital Infection</i> . 2017                                                                                                                    | to assess predictive factors and compliance with surgical site infection prevention guidelines                                                                               | 2. Testing relationships among variables | Quantitative  | Yes | SAQ                                             |     |     |     |     |
| Menendez CC, Gimeno D, Barrientos-Gutiérrez T, Burau KD, Felkner SA. Safety climate and verbal abuse are associated with patient safety culture. <i>Journal of Hospital Infection</i> . 2012                                                                                                                   | We examined whether low level of safety factors were associated with patient safety culture                                                                                  | 2. Testing relationships among variables | Quantitative  | Yes | Menendez et al. 2012                            |     |     |     |     |
| Meurling L, Hedman L, Sandahl C, Fellander-Tsai L, Wallin C-J. Systematic simulation-based team training improves patient safety culture. <i>Journal of Hospital Infection</i> . 2013                                                                                                                          | To examine the relationship between simulation-based team training and patient safety culture                                                                                | 4. Evaluation of an intervention         | Quantitative  | Yes | SAQ                                             |     |     |     |     |
| Mielke, J., S. De Geest, S. Beckmann, L. Leppla, A. Luta, R.-A. Guerbaai, S. Hunziker and R. Schwendimann (2019). "Patient Safety Culture in a Swiss Hospital." <i>Journal of Hospital Infection</i> . 2019                                                                                                    | The objectives of this cross-sectional study were to translate the patient safety culture into practice                                                                      | 2. Testing relationships among variables | Quantitative  | Yes | multiple - SAQ, HSOPS                           |     |     |     |     |
| Mihdawi, M., R. Al-Amer, R. Darwish, S. Randall and T. Afaneh (2020). "The Influence of Nursing Work Environment on Patient Safety Culture." <i>Journal of Hospital Infection</i> . 2020                                                                                                                       | This study aimed to examine the relationship between patient safety culture and nursing work environment                                                                     | 2. Testing relationships among variables | Quantitative  | Yes | HSOPS                                           |     |     |     |     |
| Mikušová V, Rusnáková V, Nadová K, Boroňová J, Beťková M. Patient safety assessment in Slovak hospital. <i>Journal of Hospital Infection</i> . 2012                                                                                                                                                            | to find out how healthcare workers perceive patient safety in their workplace                                                                                                | 1. Descriptive or exploratory assessment | Quantitative  | Yes | HSOPS                                           |     |     |     |     |
| Milne JK, Bendaly N, Bendaly L, Worsley J, Fitzgerald J, Nisker J. A measurement tool to assess culture change in hospitals. <i>Journal of Hospital Infection</i> . 2010                                                                                                                                       | We sought to develop a cultural assessment survey (CAS) to assess patient safety culture                                                                                     | 3. Methodological focus                  | Mixed methods | Yes | Cultural Assessment Survey                      | Yes | Yes | Yes | Yes |

|                                                                                                                   |      |                                                                        |                                          |              |     |                                                              |  |  |  |  |  |     |  |
|-------------------------------------------------------------------------------------------------------------------|------|------------------------------------------------------------------------|------------------------------------------|--------------|-----|--------------------------------------------------------------|--|--|--|--|--|-----|--|
| Moeidh AT, Shah VA, Yusuf RZ, Al-Matari EM, Paulas A. The relationship between prosocial voice and the            | 2015 | This study is focused on achieving two objectives; first, examining    | 2. Testing relationships among variables | Quantitative | Yes | HSOPS                                                        |  |  |  |  |  |     |  |
| Moghri J, Akbari Sari A, Yousefi M, et al. Is Scores Derived from the Most Internationally Applied Patient Sa     | 2013 | to assess the questionnaire against this bias.                         | 3. Methodological focus                  | Quantitative | Yes | HSOPS                                                        |  |  |  |  |  |     |  |
| Moghri J, Arab M, Saari AA, et al. The Psychometric Properties of the Farsi Version of "Hospital Survey on        | 2012 | The aim of this study was to assess the validity and reliability of Fa | 3. Methodological focus                  | Quantitative | Yes | HSOPS                                                        |  |  |  |  |  |     |  |
| United States                                                                                                     | 2018 | We examined relationships between employee safety climate and          | 2. Testing relationships among variables | Quantitative | Yes | SAQ; Patient Safety Culture Questionnaire (Veterans Affairs) |  |  |  |  |  |     |  |
| Mohseny M, M. Montazeri, P. Farshidmehr, H. Z. Mahmoudabadi, E. Rahimpour, N. Zamanpour and K. H.                 | 2019 | The main purpose of the present study is to investigate the insight    | 1. Descriptive or exploratory assess     | Quantitative | Yes | HSOPS                                                        |  |  |  |  |  |     |  |
| Monaca, C., B. Bestmann, M. Kattein, D. Langner, H. Müller and T. Manser (2020). "Assessing Patients' Per         | 2020 | We aimed to develop a measure explicitly focusing on patients' per     | 3. Methodological focus                  | Quantitative | Yes | ions of Safety Culture scale (PaPSC)                         |  |  |  |  |  |     |  |
| Monsees, E., J. Goldman, A. Vogelsmeier and L. Popejoy (2020). "Nurses as antimicrobial stewards: Recogn          | 2020 | to determine bedside nurses' recognition and performance confid        | 2. Testing relationships among variables | Quantitative | Yes | HSOPS                                                        |  |  |  |  |  |     |  |
| Morgan PJ, Cunningham L, Mitra S, et al. Surgical safety checklist: implementation in an ambulatory surgic        | 2013 | The threefold purpose of this study was to add ambulatory-specific     | 4. Evaluation of an intervention         | Quantitative | Yes | SAQ                                                          |  |  |  |  |  |     |  |
| Mousinho Tavares, A. P., E. C. Carvalho Moura, F. V. Silva Dantas Avelino, V. C. Aguiar Lopes and L. T. Nogu      | 2018 | to evaluate the patient safety culture from the perspective of the     | 1. Descriptive or exploratory assess     | Quantitative | Yes | HSOPS                                                        |  |  |  |  |  |     |  |
| Moussavi F, Moghri J, Gholizadeh Y, et al. Assessment of patient safety culture among personnel in the ho         | 2013 | The aim of this study was to assess the patient safety culture at is   | 1. Descriptive or exploratory assess     | Quantitative | Yes | HSOPS                                                        |  |  |  |  |  |     |  |
| Mueithing SE, Goudie A, Schoettker PJ, et al. Quality improvement initiative to reduce serious safety event       | 2012 | We conducted a quality improvement initiative to implement cult        | 4. Evaluation of an intervention         | Quantitative | Yes | HSOPS                                                        |  |  |  |  |  |     |  |
| Muralidhar S, Taneja A, Ramesh V. Patient safety culture-perception of health care workers in a tertiary ca       | 2012 | This study attempts to gain knowledge on the practices and attitu      | 1. Descriptive or exploratory assess     | Quantitative | Yes | muralidhar et al., 2012                                      |  |  |  |  |  |     |  |
| Murphy, T., A. Lupton and J. Bender (2018). "Sustained Improvement in Neonatal Intensive Care Unit Saf            | 2018 | This study aimed to measure safety attitudes in the neonatal inte      | 4. Evaluation of an intervention         | Quantitative | Yes | HSOPS                                                        |  |  |  |  |  |     |  |
| Najjar S, Hamdan M, Baillien E, et al. The Arabic version of the hospital survey on patient safety culture: a     | 2013 | The aim of this study is to investigate the psychometric properties    | 3. Methodological focus                  | Quantitative | Yes | HSOPS                                                        |  |  |  |  |  |     |  |
| Najjar, S., E. Baillien, K. Vanhaecht, M. Hamdan, M. Euwema, A. Vleugels, W. Sermeus, W. Schrooten, J. He         | 2018 | To investigate the relationships between patient safety culture (P     | 2. Testing relationships among variables | Quantitative | Yes | HSOPS                                                        |  |  |  |  |  |     |  |
| Najjar, S., N. Nafour, K. Vanhaecht and M. Euwema (2018). "Improving patient safety in Palestinian hospita        | 2018 | The aim of this study was to assess patient safety and explore rela    | 1. Descriptive or exploratory assess     | Quantitative | Yes | HSOPS                                                        |  |  |  |  |  |     |  |
| Nekoei-Moghadam, M., M. Raadabadi and M. Heidarijamebozorgi (2019). "Patient safety culture in univer             | 2019 | The aim of the study was to determine and to compare patient sa        | 1. Descriptive or exploratory assess     | Quantitative | Yes | HSOPS                                                        |  |  |  |  |  |     |  |
| Nelson S, Stone PW, Jordan S, et al. Patient safety climate: Variation in perceptions by infection preventio      | 2011 | This study explores perceptions of infection preventionists (IPs) a    | 1. Descriptive or exploratory assess     | Quantitative | Yes | PSCHO                                                        |  |  |  |  |  |     |  |
| Nguyen G, Gambashidze N, Ilyas SA, Pasco D. Validation of the safety attitudes questionnaire (short form          | 2015 | The study is aimed at cross-culturally validating the questionnaire    | 3. Methodological focus                  | Quantitative | Yes | SAQ                                                          |  |  |  |  |  |     |  |
| Nie Y, Mao X, Cui H, He S, Li J, Zhang M. Hospital survey on patient safety culture in China. BMC Health Ser      | 2013 | This study explores the attitudes and perceptions of patient safety    | 1. Descriptive or exploratory assess     | Quantitative | Yes | HSOPS                                                        |  |  |  |  |  |     |  |
| Nilsson, U., C. Goras, F. Y. Wallentin, A. Ehrenberg and M. Unbeck (2018). "The Swedish Safety Attitudes Q        | 2018 | To validate the Swedish Safety Attitudes Questionnaire-operating       | 3. Methodological focus                  | Quantitative | Yes | SAQ                                                          |  |  |  |  |  |     |  |
| Noord, I. V.-v., M. Smits, N. C. Zwinjenberg, P. Spreuwenberg, C. Wagner and I. Verbeek-van Noord (2019)          | 2019 | We examined whether a nation-wide patient safety programme (E          | 4. Evaluation of an intervention         | Quantitative | Yes | HSOPS                                                        |  |  |  |  |  |     |  |
| Notaro, K. A. M., A. R. Corréa, A. Tomazoni, P. K. Rocha and B. F. Manzo (2019). "Safety culture of multidisc     | 2019 | analyze the safety culture of multidisciplinary teams from three n     | 1. Descriptive or exploratory assess     | Quantitative | Yes | HSOPS                                                        |  |  |  |  |  |     |  |
| Noureldin, M. and M. A. Nouredin (2020). "Reporting frequency of three near-miss error types among hos            | 2020 | The study objectives were to: 1) explore hospital pharmacists' rep     | 2. Testing relationships among variables | Quantitative | Yes | HSOPS                                                        |  |  |  |  |  |     |  |
| Occelli P, Quenon JL, Hubert B, et al. Development of a safety culture: initial measurements at six hospita       | 2011 | Development of a safety culture: initial measurements at six hosp      | 1. Descriptive or exploratory assess     | Quantitative | Yes | HSOPS                                                        |  |  |  |  |  |     |  |
| Occelli P, Quenon JL, Kret M, et al. Validation of the French version of the Hospital Survey on Patient Safet     | 2013 | To assess the psychometric properties of the French version of the     | 3. Methodological focus                  | Quantitative | Yes | HSOPS                                                        |  |  |  |  |  |     |  |
| Occelli, P., J.-L. Quenon, M. Kret, S. Domecq, A. Denis, F. Delaperche, O. Clavierie, B. Castets-Fontaine, R. Al  | 2019 | To assess the impact of a vignette-based analysis of adverse even      | 4. Evaluation of an intervention         | Quantitative | Yes | HSOPS                                                        |  |  |  |  |  |     |  |
| O'Connor S, Carlson E. Safety Culture and Senior Leadership Behavior: Using Negative Safety Ratings to Ali        | 2016 | This report describes how staff-designed behavior changes among        | 4. Evaluation of an intervention         | Quantitative | Yes | SAQ                                                          |  |  |  |  |  |     |  |
| Odell, D. C., M. Quinn, R. S. Matulewicz, J. Johnson, K. E. Engelhardt, J. J. Stulberg, A. D. Yang, J. L. Holl    | 2019 | We examine the safety culture in a statewide hospital quality imp      | 2. Testing relationships among variables | Quantitative | Yes | SAQ                                                          |  |  |  |  |  |     |  |
| Ohn A, Rutberg H, Nilsen P. Patient safety dialogue: evaluation of an intervention aimed at achieving an in       | 2011 | This paper evaluates the results and changes after 5 years of the p    | 4. Evaluation of an intervention         | Qualitative  | Yes |                                                              |  |  |  |  |  | Yes |  |
| Okofo, C. H., A. C. Ugwu and I. E. Okon (2018). "Effects of Patient Safety Culture on Patient Satisfaction W      | 2018 | To assess the effect of patient safety culture on patient satisfactio  | 2. Testing relationships among variables | Quantitative | Yes | HSOPS                                                        |  |  |  |  |  |     |  |
| Okuyama, J. H., T. F. Galvão, M. T. L. Crozatti and M. T. Silva (2019). "Health professionals' perception of      | 2019 | To assess patient safety culture in a university hospital.             | 1. Descriptive or exploratory assess     | Quantitative | Yes | HSOPS                                                        |  |  |  |  |  |     |  |
| O'Leary KJ, Havley C, Slade ME, Shah HM, Lee J, Williams MV. Improving teamwork: impact of structured             | 2011 | to assess the impact of an intervention, Structured Inter-Disciplin    | 4. Evaluation of an intervention         | Quantitative | Yes | SAQ                                                          |  |  |  |  |  |     |  |
| O'Leary KJ, Wayne DB, Havley C, Slade ME, Lee J, Williams MV. Improving teamwork: impact of structured            | 2010 | to assess the impact of an intervention, structured inter-disciplin    | 4. Evaluation of an intervention         | Quantitative | Yes | SAQ                                                          |  |  |  |  |  |     |  |
| Olson E, Aase K. A comparative study of safety climate differences in healthcare and the petroleum indust         | 2010 | The aim of this article is to compare safety climate in healthcare a   | 1. Descriptive or exploratory assess     | Quantitative | Yes | HSOPS                                                        |  |  |  |  |  |     |  |
| Olson E. Exploring the possibility of a common structural model measuring associations between safety cli         | 2010 | to explore the possibility of identifying general safety climate con   | 2. Testing relationships among variables | Quantitative | Yes | HSOPS                                                        |  |  |  |  |  |     |  |
| Olson DP, Fields BG, Windish DM. Geographic Localization of Housestaff Inpatients Improves Patient-Cli            | 2015 | assesses whether geographic localization of housestaff patients co     | 2. Testing relationships among variables | Quantitative | Yes | SAQ                                                          |  |  |  |  |  |     |  |
| Olsson C, Forsberg A, Bjersa K. Safety climate and readiness for implementation of evidence and person ce         | 2016 | to explore the safety climate and readiness to implement eviden        | 1. Descriptive or exploratory assess     | Quantitative | Yes | SAQ                                                          |  |  |  |  |  |     |  |
| Omid, L., R. Akbari, E. Hadavandi and E. Zarei (2018). "An intelligent algorithm for assessing patient safet      | 2018 | The present study aimed to measure PSC and healthcare professi         | 3. Methodological focus                  | Quantitative | Yes | HSOPS                                                        |  |  |  |  |  |     |  |
| Önler, E. and N. Akyolcu (2019). "Evaluation of operating room staff's attitudes related to patient safety: A     | 2019 | This research was performed in order to evaluate the safety attitu     | 1. Descriptive or exploratory assess     | Quantitative | Yes | SAQ                                                          |  |  |  |  |  |     |  |
| Ortiz de Elguea, J., A. Orkaizagirre-Gomara, M. Sanche De Miguen, F. Urcola-Pardo, C. German-Bes and I.           | 2019 | The aim was to adapt and validate a new version of the Hospital S      | 3. Methodological focus                  | Quantitative | Yes | HSOPS                                                        |  |  |  |  |  |     |  |
| Ozer, S., H. Sarisilmaz Kankaya, H. Aktas Toptaş and F. S. Aykar (2019). "Attitudes Toward Patient Safety an      | 2019 | The goal of this descriptive, cross-sectional study was to evaluate    | 1. Descriptive or exploratory assess     | Quantitative | Yes | SAQ                                                          |  |  |  |  |  |     |  |
| Paez K, Schur C, Zhao L, Lucado J. A national study of nurse leadership and supports for quality improvem         | 2013 | This study assessed the perceptions and actions of rural hospital r    | 1. Descriptive or exploratory assess     | Quantitative | Yes | Paez et al. 2013                                             |  |  |  |  |  |     |  |
| Paine LA, Rosenstein BJ, Sexton JB, Kent P, Holzmueller CG, Pronovost PJ. Assessing and improving safety          | 2010 | To describe the authors' hospital-wide efforts to improve safety c     | 4. Evaluation of an intervention         | Quantitative | Yes | SAQ                                                          |  |  |  |  |  |     |  |
| Palmieri, P. A., J. M. Leyva-Moral, D. E. Camacho-Rodriguez, N. Granel-Gimenez, E. W. Ford, K. M. Mathies         | 2020 | The purpose of this study was to develop a target-language HSOP        | 3. Methodological focus                  | Quantitative | Yes | HSOPS                                                        |  |  |  |  |  |     |  |
| Palomar M, Alvarez-Lerma F, Riera A, et al. Impact of a national multimodal intervention to prevent cathet        | 2013 | to assess its effectiveness after contextual adaptation at large-sca   | 4. Evaluation of an intervention         | Quantitative | Yes | HSOPS                                                        |  |  |  |  |  |     |  |
| Paradis, L. (2019). "Just culture: It's more than policy." Nursing Management 50(6): 38-45                        | 2019 | The article discusses a study at an urban teaching hospital in New     | 2. Testing relationships among variables | Quantitative | Yes | ure Assessment Tool (JCAT)                                   |  |  |  |  |  |     |  |
| Parry G, Horowitz L, Goldmann D. Patient safety attitudes of paediatric trainee physicians. Quality & safety      | 2009 | To measure the patient safety attitudes of trainee physicians at a     | 1. Descriptive or exploratory assess     | Quantitative | Yes | SAQ                                                          |  |  |  |  |  |     |  |
| Patel S, Wu AW. Safety Culture in Indian Hospitals: A Cultural Adaptation of the Safety Attitudes Question        | 2016 | to translate and culturally adapt the Safety Attitudes Questionn       | 3. Methodological focus                  | Quantitative | Yes | SAQ                                                          |  |  |  |  |  |     |  |
| Patterson MD, Geis GL, LeMaster T, Wears RL. Impact of multidisciplinary simulation-based training on pati        | 2013 | To improve patient safety in a paediatric ED by implementing a m       | 4. Evaluation of an intervention         | Quantitative | Yes | SAQ                                                          |  |  |  |  |  |     |  |
| Patterson ME, Bogart MS, Starr KR. Associations between perceived crisis mode work climate and poor inf           | 2015 | Associations between perceived crisis mode work climate and poor       | 2. Testing relationships among variables | Quantitative | Yes | HSOPS                                                        |  |  |  |  |  |     |  |
| Patterson ME, Pace HA, Fincham JE. Associations between communication climate and the frequency of m              | 2013 | to identify the extent to which perceived communication climate        | 2. Testing relationships among variables | Quantitative | Yes | HSOPS                                                        |  |  |  |  |  |     |  |
| Patterson ME, Pace HA. A Cross-sectional Analysis Investigating Organizational Factors That Influence Nea         | 2016 | to determine the extent to which punitive work climate, inadequa       | 2. Testing relationships among variables | Quantitative | Yes | HSOPS                                                        |  |  |  |  |  |     |  |
| Patterson, P. D., Huang, D. T., Fairbanks, R. J., & Wang, H. E. (2010). The emergency medical services safet      | 2010 | The emergency medical services safety attitudes questionnaire          | 1. Descriptive or exploratory assess     | Quantitative | Yes | SAQ                                                          |  |  |  |  |  |     |  |
| Pavan, N. F. P., A. L. P. Magalhães, D. F. Poncio, R. A. Ascari, P. D. Zanini, N. d. S. Knhs and O. M. Silva (201 | 2019 | To evaluate the patient safety culture in the perioperative renal tr   | 1. Descriptive or exploratory assess     | Quantitative | Yes | SAQ                                                          |  |  |  |  |  |     |  |
| Pernerger TV, Staines A, Kundig F. Internal consistency, factor structure and construct validity of the French    | 2014 | To assess the psychometric properties of the French-language ver       | 3. Methodological focus                  | Quantitative | Yes | HSOPS                                                        |  |  |  |  |  |     |  |
| Perng SJ, Yu ML. Psychometric testing of an instrument measuring nurse aides' patient safety attitudes. J         | 2013 | To develop and test the patient safety attitude scale-nurse aide (P    | 3. Methodological focus                  | Quantitative | Yes | f safety attitude scale-nurse aides (PSAS-NA)                |  |  |  |  |  |     |  |
| Peterson K, Rogers BME, Brosseau LM, et al. Differences in Hospital Managers', Unit Managers', and Health         | 2016 | This article compares hospital managers' (HM), unit managers' (U       | 1. Descriptive or exploratory assess     | Quantitative | Yes | eterson et al. 2016                                          |  |  |  |  |  |     |  |
| Petschonek S, Burlison J, Cross C, et al. Development of the just culture assessment tool: measuring the pe       | 2013 | to develop a measure of individual perceptions of just culture for     | 3. Methodological focus                  | Quantitative | Yes | ture Assessment Tool (JCAT), HSOPS                           |  |  |  |  |  |     |  |



|                                                                                                                    |      |                                                                        |                                      |              |     |                                                 |     |  |     |  |  |  |
|--------------------------------------------------------------------------------------------------------------------|------|------------------------------------------------------------------------|--------------------------------------|--------------|-----|-------------------------------------------------|-----|--|-----|--|--|--|
| Pettker CM, Thung SF, Norwitz ER, et al. Impact of a comprehensive patient safety strategy on obstetric ad         | 2009 | We implemented a comprehensive strategy to track and reduce a          | 4. Evaluation of an intervention     | Quantitative | Yes | SAQ                                             |     |  |     |  |  |  |
| Pettker CM, Thung SF, Raab CA, et al. A Comprehensive Obstetrics Patient Safety Program Improves Safety            | 2011 | The purpose of this study was to determine the effect of an obstet     | 4. Evaluation of an intervention     | Quantitative | Yes | SAQ                                             |     |  |     |  |  |  |
| Pfeiffer V, Manser T. Development of the German version of the Hospital Survey on Patient Safety Culture           | 2010 | We developed a German version of the HSOPSC and investigated           | 3. Methodological focus              | Quantitative | Yes | HSOPS                                           |     |  |     |  |  |  |
| Pinheiro JPA, Uva AdS. Safety climate in the operating room: Translation, validation and application of the        | 2016 | This study presents the validation of the Operating Room Version       | 3. Methodological focus              | Quantitative | Yes | SAQ                                             |     |  |     |  |  |  |
| Pinheiro MP, Junior OCS. Evaluation of the patient safety culture within the hospital organization of a univ       | 2017 | addressing the assessment of nurse caretakers about the patient        | 1. Descriptive or exploratory assess | Quantitative | Yes | HSOPS                                           |     |  |     |  |  |  |
| Poley MJ, van der Starre C, van den Bos A, van Dijk M, Tibboel D. Patient safety culture in a Dutch pediatric      | 2011 | to measure the safety climate in our unit, compare it with benchr      | 1. Descriptive or exploratory assess | Quantitative | Yes | SAQ                                             |     |  |     |  |  |  |
| Pousette A, Larसन P, Eklof M, Torner M. The relationship between patient safety climate and occupatio              | 2017 | The aim of this study was to investigate the relationship between      | 2. Testing relationships among varia | Quantitative | Yes | tional Safety Climate Questionnaire, HSOPS      |     |  |     |  |  |  |
| Prati G, Pietrantoni L. Attitudes to teamwork and safety among Italian surgeons and operating room nurse           | 2014 | The aim of this study was to assess attitudes about teamwork and       | 1. Descriptive or exploratory assess | Quantitative | Yes | ORMAQ                                           |     |  |     |  |  |  |
| Pringle J, Weber RJ, Rice K, Kirisci L, Sirio C. Examination of how a survey can spur culture changes using a      | 2009 | The objective of this study was to investigate safety climates with    | 1. Descriptive or exploratory assess | Quantitative | Yes | (VHA) hospital survey on patient safety culture |     |  |     |  |  |  |
| Profit J, Etchegaray J, Petersen LA, et al. Neonatal intensive care unit safety culture varies widely. Archives    | 2012 | To describe NICU care giver assessments of safety culture, explor      | 2. Testing relationships among varia | Quantitative | Yes | SAQ                                             |     |  |     |  |  |  |
| Profit J, Etchegaray J, Petersen LA, et al. The Safety Attitudes Questionnaire as a tool for benchmarking saf      | 2012 | To determine whether the dimensions of safety culture measured         | 3. Methodological focus              | Quantitative | Yes | SAQ                                             |     |  |     |  |  |  |
| Profit J, Lee HC, Sharek PJ, et al. Comparing NICU teamwork and safety climate across two commonly used            | 2016 | to assess variation in safety and teamwork climate and in the neo      | 3. Methodological focus              | Quantitative | Yes | ultiple - SAQ, HSOPS                            |     |  |     |  |  |  |
| Profijt J, Sharek PJ, Ampoker AB, et al. Burnout in the NICU setting and its relation to safety culture. BMJ       | 2014 | 2) Test the psychometric properties of a brief four-item burnout s     | 2. Testing relationships among varia | Quantitative | Yes | SAQ                                             |     |  |     |  |  |  |
| Putnam LR, Levy SM, Kellagher CM, et al. Surgical resident education in patient safety: where can we impr          | 2015 | We hypothesized that surgical residents perceive the perioperativ      | 1. Descriptive or exploratory assess | Quantitative | Yes | SAQ                                             |     |  |     |  |  |  |
| Putnam LR, Pham DH, Ostovar-Kermani TG, et al. How Should Surgical Residents Be Educated About Patie               | 2016 | We hypothesized that a dedicated, adjunctive resident safety wor       | 4. Evaluation of an intervention     | Quantitative | Yes | SAQ                                             |     |  |     |  |  |  |
| Qin C, Xie J, Jiang J, Zhen F, Ding S. Reporting among nurses and its correlation with hospital safety culture     | 2015 | the aims of this study were to analyze the behaviors of nurses in      | 2. Testing relationships among varia | Quantitative | Yes | SAQ                                             |     |  |     |  |  |  |
| Quan M, Wang X, Wu H, et al. Influencing factors on use of standard precautions against occupational exp           | 2015 | To investigate how specific factors, including knowledge, attitude     | 2. Testing relationships among varia | Quantitative | Yes | Quan et al. 2015                                |     |  |     |  |  |  |
| Quillivan RR, Burlison JD, Browne EK, Scott SD, Hoffman JM. Patient Safety Culture and the Second Victim           | 2016 | to assess the influence of patient safety culture on second victim     | 2. Testing relationships among varia | Quantitative | Yes | HSOPS                                           |     |  |     |  |  |  |
| Raessi P, N. Reisi and A. A. Nasiripour (2018). "Assessment of Patient Safety Culture in Iranian Academic          | 2018 | The goal of this study was to establish a baseline for PSC in Iranian  | 1. Descriptive or exploratory assess | Quantitative | Yes | HSOPS                                           |     |  |     |  |  |  |
| Raftopoulos V, Pavlakis A. Safety climate in 5 intensive care units: a nationwide hospital survey using the        | 2013 | The explicit need to focus on quality of care underpins the aim of     | 1. Descriptive or exploratory assess | Quantitative | Yes | SAQ                                             |     |  |     |  |  |  |
| Raftopoulos V, Savva N, Papadopoulou M. Safety culture in the maternity units: a census survey using the           | 2011 | to initially evaluate the safety culture and teamwork climate in th    | 1. Descriptive or exploratory assess | Quantitative | Yes | SAQ                                             |     |  |     |  |  |  |
| Rajalatchumi, A., T. S. Ravikumar, K. Muruganandham, M. Thulasigam, K. Selvaraj, M. M. Reddy and B. Ja             | 2018 | The aim of the study was to assess the perceptions on patient saf      | 1. Descriptive or exploratory assess | Quantitative | Yes | HSOPS                                           |     |  |     |  |  |  |
| Ramos, R. R. and C. C. Calidgíd (2018). "Patient safety culture among nurses at a tertiary government hosp         | 2018 | To assess the patient safety culture (PSC) among nurses at a gove      | 1. Descriptive or exploratory assess | Quantitative | Yes | HSOPS                                           |     |  |     |  |  |  |
| Randmaa M, Mårtensson G, Swenne CL, Engström M. SBAR improves communication and safety climate a                   | 2014 | We aimed to examine staff members' perceptions of communicat           | 4. Evaluation of an intervention     | Quantitative | Yes | SAQ                                             |     |  |     |  |  |  |
| Rasmussen K, Pedersen AH, Pape L, Mikkelsen KL, Madsen MD, Nielsen KJ. Work environment influences a               | 2014 | The purpose of this study was to investigate the occurrence of ad      | 2. Testing relationships among varia | Quantitative | Yes | SAQ                                             |     |  |     |  |  |  |
| azzani, B., F. Atashzadeh-Shoorideh, T. Jamshidi, M. Barkhordari-Sharifabad, Z. Lotfi and V. Skerrett (2020)       | 2020 | investigates the effect of education around ethical principles on n    | 4. Evaluation of an intervention     | Quantitative | Yes | HSOPS                                           |     |  |     |  |  |  |
| Real K, Kim S, Conigliaro J. Using a validated health promotion tool to improve patient safety and increas         | 2013 | This study employed the risk perception attitude (RPA) framewor        | 2. Testing relationships among varia | Quantitative | Yes | ahn & Murphy, 2008                              |     |  |     |  |  |  |
| Reis CT, Laguardia J, Vasconcelos AG, Martins M. Reliability and validity of the Brazilian version of the Hos      | 2016 | This study explored the reliability and validity of the Brazilian vers | 3. Methodological focus              | Quantitative | Yes | HSOPS                                           |     |  |     |  |  |  |
| Reis, C. T., J. Laguardia, C. G. De Barros, P. B. De Araujo Andreoli and M. Martins (2019). "Reliability and va    | 2019 | This study aimed to reassess the psychometric properties of the        | 3. Methodological focus              | Quantitative | Yes | HSOPS                                           |     |  |     |  |  |  |
| Relihan E, Glynn S, Daly D, Silke B, Ryder S. Measuring and benchmarking safety culture: application of the        | 2009 | To assess the safety culture in an acute medical admissions unit (     | 1. Descriptive or exploratory assess | Quantitative | Yes | SAQ                                             |     |  |     |  |  |  |
| Reszel, J., D. Weiss, A. E. Sprague, D. B. Fell, S. Dunn, M. C. Walker, D. Sidney, M. Taljaard and W. E. Peters    | 2019 | The purpose of our study was to assess the effect of MOREOB on         | 4. Evaluation of an intervention     | Quantitative | Yes | ral Assessment Survey                           |     |  |     |  |  |  |
| Rezaei, S. and S. Salehi (2018). "A Study of the Relationship between Emotional Intelligence and Patient Sa        | 2018 | the aim of this study was to investigate the relationship between      | 2. Testing relationships among varia | Quantitative | Yes | HSOPS                                           |     |  |     |  |  |  |
| Ribelliene, J., A. Blazevičienė, R. J. Nadisauskienė, R. Tameliene, A. Kudrevičienė, I. Nedzelskiene and J. Mac    | 2019 | The aim of the study was to evaluate the opinion of nurses and m       | 1. Descriptive or exploratory assess | Quantitative | Yes | HSOPS                                           |     |  |     |  |  |  |
| Richter JP, McAlearney AS, Pennell ML. Evaluating the effect of safety culture on error reporting: a compar        | 2015 | The study aims were to identify the organizational factors with th     | 2. Testing relationships among varia | Quantitative | Yes | HSOPS                                           |     |  |     |  |  |  |
| Richter JP, McAlearney AS, Pennell ML. The influence of organizational factors on patient safety: Examini          | 2016 | Our aims were (a) to determine whether perceptions of organizat        | 2. Testing relationships among varia | Quantitative | Yes | HSOPS                                           |     |  |     |  |  |  |
| Richter JP, McAlearney AS. Targeted implementation of the Comprehensive Unit-Based Safety Program th               | 2016 | The purpose of this study is to identify the significant factors of sa | 4. Evaluation of an intervention     | Quantitative | Yes | HSOPS                                           |     |  |     |  |  |  |
| Ricklin, M. E., F. Hess and W. E. Hautz (2019). "Patient safety culture in a university hospital emergency de      | 2019 | the aim of the present study was to assess patient safety culture i    | 1. Descriptive or exploratory assess | Quantitative | Yes | HSOPS                                           |     |  |     |  |  |  |
| Rigobello MCG, Carvalho R, Guerreiro JM, Motta APG, Atila E, Gimenes FRE. The perception of the patient            | 2017 | The aim of this study was to assess the patient safety climate from    | 1. Descriptive or exploratory assess | Quantitative | Yes | SAQ                                             |     |  |     |  |  |  |
| Robida A. Hospital Survey on Patient Safety Culture in Slovenia: a psychometric evaluation. Int J Qual Heal        | 2013 | To study the psychometric properties of a translated version of th     | 3. Methodological focus              | Quantitative | Yes | HSOPS                                           |     |  |     |  |  |  |
| Roqueeta Egea F, Tomas Vecina S, Chanovas Borrás MR. Patient safety culture in 30 Spanish hospital emerg           | 2011 | 1) To ascertain the level of patient safety culture in hospital emer   | 1. Descriptive or exploratory assess | Quantitative | Yes | HSOPS                                           |     |  |     |  |  |  |
| Rosen AK, Singer S, Shilbei Z, Shokeen P, Meterko M, Gaba D. Hospital safety climate and safety outcomes:          | 2010 | explored the potential relationship between safety climate and Ve      | 2. Testing relationships among varia | Quantitative | Yes | PSCHO                                           |     |  |     |  |  |  |
| Røyset, B., B. A. Talseth-Palmer, S. Lydersen and P. G. Farup (2019). "Effects of a fall prevention program in     | 2019 | This study assessed the effects of a fall prevention program on th     | 4. Evaluation of an intervention     | Quantitative | Yes | SAQ                                             |     |  |     |  |  |  |
| Rozenbojm MD, Nichol K, Spielmann S, Holness DL. Hospital unit safety climate: Relationship with nurses' adherence | 2015 | Hospital unit safety climate: Relationship with nurses' adherence      | 2. Testing relationships among varia | Quantitative | Yes | HSCS                                            |     |  |     |  |  |  |
| Sabry, H. A., M. A. Soliman, H. M. Bazaraa and A. A. Hegazy (2020). "Improving patient safety at pediatric         | 2020 | The researchers attempted to assess healthcare providers' persp        | 1. Descriptive or exploratory assess | Qualitative  |     |                                                 | Yes |  | Yes |  |  |  |
| Sahebzamani M, Mohammady M. A study of patient safety management in the framework of clinical gov                  | 2014 | to evaluate patient safety management in the framework of clinic       | 1. Descriptive or exploratory assess | Quantitative | Yes | mani & Mohammady, 2014                          |     |  |     |  |  |  |
| Saladino, L., Pickett, L. C., Frush, K., Mall, A., & Champagne, M. T. (2013). Evaluation of a nurse-led safety     | 2013 | Evaluation of a nurse-led safety program in a critical care unit.      | 4. Evaluation of an intervention     | Quantitative | Yes | SAQ                                             |     |  |     |  |  |  |
| Saleh AM, Darawad MW, Al-Hussami M. The perception of hospital safety culture and selected outcomes                | 2015 | to examine nurses' perceptions of the hospital safety culture in Jo    | 2. Testing relationships among varia | Quantitative | Yes | HSOPS                                           |     |  |     |  |  |  |
| Salem, M., J. Labib, A. Mahmoud and S. Shalaby (2019). "Nurses' Perceptions of Patient Safety Culture in I         | 2019 | To assess the patient safety culture dimensions from the nurses' p     | 1. Descriptive or exploratory assess | Quantitative | Yes | HSOPS                                           |     |  |     |  |  |  |
| Sammer, C., L. D. Hauck, C. Jones, J. Zaiback-Aldinger, M. Li and D. Classen (2020). "Examining the Relatio        | 2020 | The objective of this study was to examine the relationship betwe      | 2. Testing relationships among varia | Quantitative | Yes | ultiple - HSOPS, SAQ                            |     |  |     |  |  |  |
| Samsuri SE, Pei Lin L, Fahrni ML. Safety culture perceptions of pharmacists in Malaysian hospitals and heal        | 2015 | To assess the safety attitudes of pharmacists, provide a profile of    | 2. Testing relationships among varia | Quantitative | Yes | SAQ                                             |     |  |     |  |  |  |
| Santa, R., S. Borrero, M. Ferrer and D. Gherissi (2018). "Fostering a healthcare sector quality and safety cul     | 2018 | The purpose of this paper is to identify the most important QSC d      | 1. Descriptive or exploratory assess | Quantitative | Yes | Santa et al., 2018                              |     |  |     |  |  |  |
| Santana HT, Rodrigues MCS, Do Socorro Nantua Evangelista M. Surgical teams' attitudes and opinions tow             | 2016 | to assess the attitudes and opinions towards surgical safety among     | 1. Descriptive or exploratory assess | Quantitative | Yes | SAQ                                             |     |  |     |  |  |  |
| Santiago TH, Turrini RN. Organizational culture and climate for patient safety in Intensive Care Units. Revis      | 2015 | To assess the perception of health professionals about patient saf     | 3. Methodological focus              | Quantitative | Yes | ultiple - SAQ, HSOPS                            |     |  |     |  |  |  |
| Sarac C, Flin R, Mearns K, Jackson J. Hospital survey on patient safety culture: psychometric analysis on a        | 2011 | To investigate the psychometric properties of the Hospital Survey      | 3. Methodological focus              | Quantitative | Yes | HSOPS                                           |     |  |     |  |  |  |
| Scherer D, Fitzpatrick JJ. Perceptions of patient safety culture among physicians and RNs in the perioperat        | 2008 | Perceptions of patient safety culture among physicians and RNs in      | 1. Descriptive or exploratory assess | Quantitative | Yes | HSOPS                                           |     |  |     |  |  |  |
| Schubert M, Ausserhofer D, Desmedt M, et al. Levels and correlates of implicit rationing of nursing care in Sw     | 2013 | (1) To describe the levels of implicit rationing of nursing care in Sw | 2. Testing relationships among varia | Quantitative | Yes | SOS                                             |     |  |     |  |  |  |
| Schwappach, D. and A. Richard (2018). "Speak up-related climate and its association with healthcare work           | 2018 | To determine frequencies of healthcare workers (HCWs) speak up         | 2. Testing relationships among varia | Quantitative | Yes | atient Safety Questionnaire (SUPS-Q)            |     |  |     |  |  |  |
| Schwappach, D., G. Sendhofer, L. Häslér, V. Gombotz, K. Leitgeb, M. Hoffmann, L. Jantscher and G. Brunne           | 2018 | To analyze speaking up behavior and safety climate with a validat      | 1. Descriptive or exploratory assess | Quantitative | Yes | atient Safety Questionnaire (SUPS-Q)            |     |  |     |  |  |  |
| Schwappach, D., G. Sendhofer, L. P. Kamolz, W. Köle and G. Brunner (2019). "Speaking up culture of medic           | 2019 | to assess students' speaking up behaviors and perceived culture in     | 1. Descriptive or exploratory assess | Quantitative | Yes | atient Safety Questionnaire (SUPS-Q)            |     |  |     |  |  |  |





|                                                                                                                     |      |                                                                       |                                      |               |     |                                                              |     |     |     |  |
|---------------------------------------------------------------------------------------------------------------------|------|-----------------------------------------------------------------------|--------------------------------------|---------------|-----|--------------------------------------------------------------|-----|-----|-----|--|
| Walston SL, Al-Omar BA, Al-Mutari FA. Factors affecting the climate of hospital patient safety: a study of h        | 2010 | The purpose of this paper is to describe three organizational dime    | 2. Testing relationships among vari  | Quantitative  | Yes | Walston et al. 2010                                          |     |     |     |  |
| Wami SD, Demisie AF, Wassie MM, Ahmed AN. Patient safety culture and associated factors: A quantitativ              | 2016 | the aim of this study was to assess the level of patient safety cultu | 1. Descriptive or exploratory assess | Mixed methods | Yes | HSOPS                                                        | Yes |     |     |  |
| Wang X, Liu K, You LM, et al. The relationship between patient safety culture and adverse events: a questi          | 2014 | to describe nurses' perception of patient safety culture and frequ    | 2. Testing relationships among vari  | Quantitative  | Yes | HSOPS                                                        |     |     |     |  |
| Wang, K. Y., C. C. Chou and J. C. Y. Lai (2019). "A structural model of total quality management, work value        | 2019 | This study explores the impact of total quality management on pa      | 2. Testing relationships among vari  | Quantitative  | Yes | HSOPS                                                        |     |     |     |  |
| Wang, Y., H. Han, L. Qiu, C. Liu, Y. Wang and W. Liu (2019). "Development of a patient safety culture sc            | 2019 | This study aimed to develop a patient safety culture (PSC) scale fo   | 3. Methodological focus              | Quantitative  | Yes | and Child Health Institutions (PSCS-MCHI) (Wang et al. 2019) |     |     |     |  |
| Waterson P, Griffiths P, Stride C, Murphy J, Hignett S. Psychometric properties of the Hospital Safety Cl           | 2010 | This study reports an assessment of the psychometric properties       | 3. Methodological focus              | Quantitative  | Yes | HSOPS                                                        |     |     |     |  |
| Watts BV, Percarpio K, West P, Mills PD. Use of the Safety Attitudes Questionnaire as a measure in patient          | 2010 | We report on an attempt to use the Safety Attitudes Questionnaire     | 4. Evaluation of an intervention     | Quantitative  | Yes | SAQ                                                          |     |     |     |  |
| Weaver SJ, Rosen MA, DiazGranados D, et al. Does teamwork improve performance in the operating room? A r            | 2010 | Does teamwork improve performance in the operating room? A r          | 4. Evaluation of an intervention     | Quantitative  | Yes | Multiple - HSOPS, ORMAQ                                      |     |     |     |  |
| Weaver SJ, Weeks K, Pham JC, Pronovost PJ. On the CUSP: Stop BSI: evaluating the relationship between c             | 2014 | to investigate the relationship between intensive care unit (ICU) p   | 2. Testing relationships among vari  | Quantitative  | Yes | HSOPS                                                        |     |     |     |  |
| Weaver, S. J., S. E. Mossburg, M. Pillari, P. S. Kent and E. L. D. Biddison (2018). "Examining Variation in Mer     | 2018 | This study explored similarities and differences in the views on tes  | 2. Testing relationships among vari  | Quantitative  | Yes | SAQ                                                          |     |     |     |  |
| Weng R-H, Chen J-C, Pong L-J, Chen L-M, Lin T-C. The Impact of Market Orientation on Patient Safety Clima           | 2016 | explores how market orientation affects the climate of patient saf    | 2. Testing relationships among vari  | Quantitative  | Yes | climate scale (Weng et al., 2012)                            |     |     |     |  |
| Weng RH, Huang CY, Huang JA, Wang MH. The cross-level impact of patient safety climate on nursing inno              | 2012 | To explore the cross-level effects of the four dimensions of patie    | 2. Testing relationships among vari  | Quantitative  | Yes | climate scale (Weng et al., 2012)                            |     |     |     |  |
| Weng SJ, Kim SH, Wu CL. Underlying influence of perception of management leadership on patient safety               | 2017 | We aim to draw insights on how medical staff's perception of ma       | 2. Testing relationships among vari  | Quantitative  | Yes | SAQ                                                          |     |     |     |  |
| Wijaya, M. I., A. R. Mohamad and M. Hafizurrahman (2020). "Shift schedule realignment and patient safe              | 2020 | The purpose of this paper is to assess the association between sh     | 4. Evaluation of an intervention     | Quantitative  | Yes | HSOPS                                                        |     |     |     |  |
| Wolf, F. A., Way, L. W., & Stewart, L. (2010). The efficacy of medical team training: improved team perfor          | 2010 | The efficacy of medical team training: improved team performanc       | 4. Evaluation of an intervention     | Quantitative  | Yes | SAQ                                                          |     |     |     |  |
| Wu JC, Tung TH, Chen PY, Chen YL, Lin YW, Chen FL. Determinants of workplace violence against clinical p            | 2015 | understanding how organizational factors influence workplace vic      | 2. Testing relationships among vari  | Quantitative  | Yes | 1980) safety climate scale                                   |     |     |     |  |
| Wu WT, Wu YL, Hou SM, et al. Examining the effects of an interprofessional crew resource management tr              | 2016 | The study aimed to investigate the effectiveness of this intervent    | 4. Evaluation of an intervention     | Quantitative  | Yes | ude Survey (HFAS, Grogan et al., 2004)                       |     |     |     |  |
| Wu Y, Fujita S, Seto K, et al. The impact of nurse working hours on patient safety culture: a cross-national        | 2013 | to clarify the impact of long nurse working hours on PSC in Japan,    | 2. Testing relationships among vari  | Quantitative  | Yes | HSOPS                                                        |     |     |     |  |
| Wu, C. F., H. H. Wu, Y. C. Lee and C. H. Huang (2019). "What attributes determine overall satisfaction in pa        | 2019 | This study assessed the attributes of the overall perception of (sa   | 1. Descriptive or exploratory assess | Quantitative  | Yes | SAQ                                                          |     |     |     |  |
| Xu, X. P., D. N. Deng, Y. H. Gu, C. S. Ng, C. Cai, J. Xu, X. S. Zhang, D. G. Ke, Q. H. Yu and C. K. Chan (2018). "C | 2018 | This paper evaluates the current patient safety culture in an exper   | 1. Descriptive or exploratory assess | Quantitative  | Yes | HSOPS                                                        |     |     |     |  |
| Yang, R., G. A. Pepper, H. Wang, T. Liu, D. Wu and Y. Jiang (2020). "The mediating role of power distance a         | 2020 | (1) Identify nurses' perceptions of patient safety emphasis, face-s   | 2. Testing relationships among vari  | Quantitative  | Yes | ate scale (Blegen et al., 2005)                              |     |     |     |  |
| Yari, S., M. H. Naseri, H. Akbari, S. Shahsavari and H. Akbari (2019). "Interaction of Safety Climate and Safe      | 2019 | The aim of this study isto investigate the interaction between safe   | 2. Testing relationships among vari  | Quantitative  | Yes | smenit), Zeidi et al., 2012 (Safety Climate Questionnaire)   |     |     |     |  |
| Yilmaz Z, Goris S. Determination of the patient safety culture among nurses working at intensive care units         | 2015 | To determine the patient safety culture among nurses working at       | 1. Descriptive or exploratory assess | Quantitative  | Yes | HSOPS                                                        |     |     |     |  |
| Yu, B., C.-F. Wen, H.-L. Lo, H.-H. Liao and P.-C. Wang (2020). "Improvements in patient safety culture: a nat       | 2020 | To assess national trends in patient safety culture in Taiwan         | 1. Descriptive or exploratory assess | Quantitative  | Yes | SAQ                                                          |     |     |     |  |
| Yu, M., H. Y. Lee, G. Sherwood and E. Kim (2018). "Nurses' handoff and patient safety culture in perinatal          | 2018 | To examine nursing handoff, identify causes of handoff errors, ev     | 2. Testing relationships among vari  | Quantitative  | Yes | HSOPS                                                        |     |     |     |  |
| Zadow AJ, Dollard MF, McLinton SS, Lawrence P, Tuckey MR. Psychosocial safety climate, emotional exhau              | 2017 | to examine how psychosocial safety climate (PSC) influences the c     | 2. Testing relationships among vari  | Quantitative  | Yes | social safety climate (PSC)                                  |     |     |     |  |
| Zadvinskis, I. M., P. J. Salsberry, E. M. Chippis, E. S. Patterson, L. A. Szalacha and K. A. Crea (2018). "An Expl  | 2018 | This descriptive, cross-sectional study used the Safety Attitudes Q   | 2. Testing relationships among vari  | Quantitative  | Yes | SAQ                                                          |     |     |     |  |
| Zaheer S, Ginsburg L, Chuang YT, Grace SL. Patient safety climate (PSC) perceptions of frontline staff in acu       | 2015 | The broader organizational literature suggests that ease of report    | 2. Testing relationships among vari  | Quantitative  | Yes | CAN PSCS                                                     |     |     |     |  |
| Zaheer, S., L. R. Ginsburg, H. J. Wong, K. Thomson and L. Bain (2018). "Importance of safety climate, team          | 2018 | The impact of staff perceptions of safety climate (ie, senior and su  | 2. Testing relationships among vari  | Quantitative  | Yes | CAN PSCS                                                     |     |     |     |  |
| Zarei E, Khakzad N, Reniers G, Akbari R. On the relationship between safety climate and occupational burn           | 2016 | to investigate and establish a relationship between safety climate    | 2. Testing relationships among vari  | Quantitative  | Yes | Nurses (SCN, Sarasangi et al., 2015)                         |     |     |     |  |
| Zecovic AA, Li AH, Ngo C, Halligan M, Kothari A. Improving safety culture in hospitals: Facilitators and barrier    | 2017 | The purpose of this study was to assess the facilitators and barrier  | 1. Descriptive or exploratory assess | Mixed methods | Yes | MSI                                                          | Yes | Yes | Yes |  |
| Zech A, Gross B, Jasper-Birzele C, et al. Evaluation of simparteam - a needs-orientated team training form          | 2017 | Evaluation of simparteam - a needs-orientated team training form      | 4. Evaluation of an intervention     | Quantitative  | Yes | HSOPS                                                        |     |     |     |  |
| Zenere A, Zanolin ME, Negri R, Moretti F, Grassi M, Tardivo S. Assessing safety culture in NICU: psychomet          | 2016 | The aims of the study are to verify the psychometric properties of    | 3. Methodological focus              | Quantitative  | Yes | SAQ                                                          |     |     |     |  |
| Zhang, D., M. Liao, Y. Zhou and T. Liu (2020). "Quality control circle: a tool for enhancing perceptions of pa      | 2020 | To explore whether quality control circle (QCC) is associated with    | 4. Evaluation of an intervention     | Quantitative  | Yes | HSOPS                                                        |     |     |     |  |
| Zhang, F., L. Tian, X. Shang, X. Li, R. Xue, S. Cheng and C. Chen (2018). "Exploring relationships between fir      | 2018 | To examine first-line nurse managers' perceptions of safety cultur    | 1. Descriptive or exploratory assess | Quantitative  | Yes | SAQ                                                          |     |     |     |  |
| Zhang, X., Q. Li, Y. Guo and S.-Y. Lee (2019). "From organisational support to second victim-related distress       | 2019 | This cross-sectional correlation study aimed to explore the associ    | 2. Testing relationships among vari  | Quantitative  | Yes | HSOPS                                                        |     |     |     |  |
| Zhao, C., Q. Chang, X. Zhang, Q. Wu, N. Wu, J. He and Y. Zhao (2019). "Evaluation of safety attitudes of hos        | 2019 | The objectives of this study are to test the psychometric properie    | 3. Methodological focus              | Quantitative  | Yes | SAQ                                                          |     |     |     |  |
| Zhong, X., Y. Song, C. Dennis, D. J. Slovinsky, L. Y. Wei, J. Chen and J. Ji (2019). "Patient safety culture in Pe  | 2019 | This study aims to assess the patient safety culture in Peking Univ   | 1. Descriptive or exploratory assess | Quantitative  | Yes | HSOPS                                                        |     |     |     |  |
| Zhou P, Bundorf MK, Gu J, He X, Xue D. Survey on patient safety climate in public hospitals in China. BMC           | 2015 | This study aimed to describe staff's perceptions of patient safety c  | 1. Descriptive or exploratory assess | Quantitative  | Yes | PSCHO                                                        |     |     |     |  |
| Zhou, P., F. Bai, H. Q. Tang, J. Bai, M. Q. Li and D. Xue (2018). "Patient safety climate in general public hosp    | 2018 | This study analysed differences in the perceived patient safety cli   | 1. Descriptive or exploratory assess | Quantitative  | Yes | PSCHO                                                        |     |     |     |  |
| Zhu J, Li L, Zhao H, Han G, Wu AW, Weingart SN. Development of a patient safety climate survey for Chine            | 2014 | To develop and evaluate a patient safety climate instrument for h     | 3. Methodological focus              | Quantitative  | Yes | Hospital Survey on Patient Safety Climate                    |     |     |     |  |
| Zhu J, Li L, Zhou Z, Lou Q, Wu AW. Variations in Patient Safety Climate in Chinese Hospitals. J Patient Saf. Z      | 2016 | We examined variations in safety climate by work area and job ca      | 2. Testing relationships among vari  | Quantitative  | Yes | HSOPS                                                        |     |     |     |  |
| Zhu, J. (2019). "Measurement equivalence of patient safety climate in Chinese hospitals: can we compare             | 2019 | This study aims to examine the degree of measurement equivalen        | 3. Methodological focus              | Quantitative  | Yes | Hospital Survey on Patient Safety Climate                    |     |     |     |  |
| Zimmermann N, Kueng K, Sereika SM, Engberg S, Sexton B, Schwendimann R. Assessing the safety attitude               | 2013 | The objective of this study was to assess the psychometric proper     | 3. Methodological focus              | Quantitative  | Yes | SAQ                                                          |     |     |     |  |
| Zohar D, Werber YT, Marom R, Curliou B, Blondheim O. Modifying head nurse messages during daily conve               | 2017 | The current study adapts an empirically supported strategy devel      | 4. Evaluation of an intervention     | Quantitative  | Yes | PSCHO                                                        |     |     |     |  |
| Zullo MD, McCarroll ML, Mendise TM, et al. Safety culture in the gynecology robotics operating room. Joun           | 2014 | To measure the safety culture in the robotics surgery operating ro    | 4. Evaluation of an intervention     | Quantitative  | Yes | SAQ                                                          |     |     |     |  |
| Zwijenberg NC, Hendriks M, Hoogervorst-Schilp J, Wagner C. Healthcare professionals' views on feedback              | 2016 | to explore healthcare professionals' views on the feedback of a pa    | 1. Descriptive or exploratory assess | Quantitative  | Yes | HSOPS                                                        |     |     |     |  |
