# Supplementary material for: Dimensions of safety culture: a systematic review of quantitative, qualitative and mixed methods for assessing safety culture in hospitals
Source: HighWire-hosted journal article supplement (doi:10.1136/bmjopen-2020-043982), 2021-07-01
Supplement: bmjopen-2020-043982supp004_data_supplement.pdf [file bmjopen-2020-043982supp004_data_supplement.pdf]

| Name of survey, tool or approach                                                                                                                                                                                                                                           | New survey developed by study authors? | Quantitative or Mixed methods assessment | Qualitative or Mixed methods assessment                                                                    | Details                                                                                                                                                                                                | As used in | Leadership and their support for safety | Perceptions of safety | Teamwork and collaboration | Safety systems | Prioritisation of safety | Resource constraints | Reporting and feedback | Openness | Learning and improvement | Awareness of human limits | Wellbeing | Other | Details of other                                                  | Number of dimensions covered by tool                        |   |
|----------------------------------------------------------------------------------------------------------------------------------------------------------------------------------------------------------------------------------------------------------------------------|----------------------------------------|------------------------------------------|------------------------------------------------------------------------------------------------------------|--------------------------------------------------------------------------------------------------------------------------------------------------------------------------------------------------------|------------|-----------------------------------------|-----------------------|----------------------------|----------------|--------------------------|----------------------|------------------------|----------|--------------------------|---------------------------|-----------|-------|-------------------------------------------------------------------|-------------------------------------------------------------|---|
| SAQ + interviews analysed using framework analysis method                                                                                                                                                                                                                  |                                        | Mixed meth                               | Following survey, semi-structured interviews were conducted                                                | Abhi Z, Delgado B, Ravaghi H, Abbasi M, Heyrani A, et al. (2018)                                                                                                                                       |            |                                         |                       |                            |                |                          |                      |                        |          |                          |                           |           |       | Recommendations for improvement                                   | 11                                                          |   |
| Pharmacy Survey on Patient Safety Culture (PSOPSC) - based on HSC SAQ and Safety Climate Scale + interviews                                                                                                                                                                |                                        | Mixed meth                               | Interviews followed survey (which included open-ended questions based in part on the SAQ) + Prior          | Allen S, Chinnella M, Homer CS. Lessons learned from the PSOPSC. <i>Journal of Patient Safety</i> . 2018;17(1):1-6.                                                                                    |            |                                         |                       |                            |                |                          |                      |                        |          |                          |                           |           |       | Documenting mistakes; patient counseling                          | 11                                                          |   |
| Patient Safety Behavioral Intent (PSBI) - developed by Wiles                                                                                                                                                                                                               | Yes                                    | Mixed meth                               | Interviews were based on a thematic guide comprising 10 topics                                             | Boussat, B., K. Kamalainy and P. François (2018). "Patient Safety Behavioral Intent (PSBI): A New Instrument for Measuring Patient Safety Intent." <i>Journal of Patient Safety</i> . 2018;17(1):1-6.  |            |                                         |                       |                            |                |                          |                      |                        |          |                          |                           |           |       | Norms and behaviours of colleagues and the individual.            | 10                                                          |   |
| HSOPS - analysis of open responses and interviews                                                                                                                                                                                                                          |                                        | Mixed meth                               | Interview schedule not focused on dimensions of safety                                                     | Campionne, J. and T. Famolaro (2018). "Promising Practices for Improving Patient Safety Culture." <i>Journal of Patient Safety</i> . 2018;17(1):1-6.                                                   |            |                                         |                       |                            |                |                          |                      |                        |          |                          |                           |           |       |                                                                   | 9                                                           |   |
| Operating Room Management Attitudes Questionnaire (ORMAQ) - developed by Taiwan Joint Commission                                                                                                                                                                           |                                        | Quantitative                             | Fifty-six item questionnaire covering eight dimensions                                                     | Geengay, A., Reid, S., & McIlhenny, C. (2014). Examining the new Chinese SAQ with 46 items with additional items. <i>Journal of Patient Safety</i> . 2014;13(1):1-6.                                   |            |                                         |                       |                            |                |                          |                      |                        |          |                          |                           |           |       | Values                                                            | 10                                                          |   |
| Documentation - unfilled survey - developed by Chapman                                                                                                                                                                                                                     |                                        | Mixed meth                               | To assess radiation safety culture, analysis of safety                                                     | Chapple CL, Bradley A, Murray M, et al. Radiation safety culture in the UK. <i>Journal of Patient Safety</i> . 2018;17(1):1-6.                                                                         |            |                                         |                       |                            |                |                          |                      |                        |          |                          |                           |           |       |                                                                   | 10                                                          |   |
| Safety Attitudes Questionnaire - developed by Sexton et al. 2006                                                                                                                                                                                                           | Yes                                    | Quantitative                             | A 60 item survey of health professionals attitudes by Sexton H, Shorrock P, Thomas E, et al. Exposure to L | Sexton H, Shorrock P, Thomas E, et al. Exposure to L. <i>Journal of Patient Safety</i> . 2006;5(1):1-6.                                                                                                |            |                                         |                       |                            |                |                          |                      |                        |          |                          |                           |           |       |                                                                   | 10                                                          |   |
| Focus groups + HSOPS                                                                                                                                                                                                                                                       |                                        | Mixed meth                               | focus group interviews first conducted, with the inter                                                     | Elder NC, Brungs SM, Nagy M, Kuddel I, Render ML, et al. <i>Journal of Patient Safety</i> . 2018;17(1):1-6.                                                                                            |            |                                         |                       |                            |                |                          |                      |                        |          |                          |                           |           |       |                                                                   | 9                                                           |   |
| Patient Safety Climate in Healthcare Organizations - developed by Simpson                                                                                                                                                                                                  |                                        | Quantitative                             | Developed from the PSCL, this 38 item survey evaluates                                                     | Singer S, Lin S, Falwell A, Gaba D, Baker L, Relations. <i>Journal of Patient Safety</i> . 2018;17(1):1-6.                                                                                             |            |                                         |                       |                            |                |                          |                      |                        |          |                          |                           |           |       | Flexibility                                                       | 10                                                          |   |
| Patient and Occupational Safety Culture Survey - developed by Johnson et al. 2018 + inter                                                                                                                                                                                  | Yes                                    | Mixed meth                               | Survey of junior and senior surgeons included the SAQ                                                      | Johnson, M. J., S. Arora, D. King and A. Darzi (2018). "Improving the Quality of Patient Safety Culture in the UK." <i>Journal of Patient Safety</i> . 2018;17(1):1-6.                                 |            |                                         |                       |                            |                |                          |                      |                        |          |                          |                           |           |       | Supervision - adequacy of junior-senior supervisory relationship  | 7                                                           |   |
| SAQ + interviews                                                                                                                                                                                                                                                           |                                        | Mixed meth                               | Operating room (OR) version of the SAQ used first                                                          | Khosravi A, Lingard L, Wright GR. Evaluation of prede                                                                                                                                                  |            |                                         |                       |                            |                |                          |                      |                        |          |                          |                           |           |       |                                                                   | 11                                                          |   |
| unfilled survey - developed by Kirkegaard et al. 2018 + oH                                                                                                                                                                                                                 | Yes                                    | Mixed meth                               | focused on occupational health and safety, and visio                                                       | Kirkegaard, M. L., P. Kines, H. B. Nielsen and A. H. G. <i>Journal of Patient Safety</i> . 2018;17(1):1-6.                                                                                             |            |                                         |                       |                            |                |                          |                      |                        |          |                          |                           |           |       | Risk-taking behaviour "If I take chances at work, where th        | 5                                                           |   |
| Manchester Patient Safety Framework (MaPSaF) + SAQ                                                                                                                                                                                                                         |                                        | Mixed meth                               | Evaluation of an improvement project using baseline                                                        | Lachman P, Linkson L, Evans T, Clausen H, Hothi D, et al. <i>Journal of Patient Safety</i> . 2018;17(1):1-6.                                                                                           |            |                                         |                       |                            |                |                          |                      |                        |          |                          |                           |           |       |                                                                   | 10                                                          |   |
| Hospital Survey on Patient Safety Culture - developed by the Agency for Healthcare Research and Quality                                                                                                                                                                    |                                        | Quantitative                             | (dimensions): 1. Management support for patient                                                            | Sorra JS, Dyer N. Multilevel psychometric properties of                                                                                                                                                |            |                                         |                       |                            |                |                          |                      |                        |          |                          |                           |           |       |                                                                   | 9                                                           |   |
| SAQ + interviews with SAQ as framework for analysis                                                                                                                                                                                                                        |                                        | Mixed meth                               | Interviews used to probe topic of safety culture deep                                                      | Lisatoyadondo TA, Yan X, Leyshon S, et al. (2017) A                                                                                                                                                    |            |                                         |                       |                            |                |                          |                      |                        |          |                          |                           |           |       |                                                                   | 5                                                           |   |
| HSOPS + interviews and framework for analysis                                                                                                                                                                                                                              |                                        | Mixed meth                               | expanding on survey results, three safety domains                                                          | Livson D, Knobloch MJ, Blue LA, et al. A mixed assess                                                                                                                                                  |            |                                         |                       |                            |                |                          |                      |                        |          |                          |                           |           |       |                                                                   | 10                                                          |   |
| Interviews, focus groups + Cultural Assessment Survey                                                                                                                                                                                                                      |                                        | Mixed meth                               | Qualitative data used to inform survey development                                                         | Milne JK, Bendaly N, Bendaly L, Worsley J, Fitzgerald J, Nisker J. A measur                                                                                                                            |            |                                         |                       |                            |                |                          |                      |                        |          |                          |                           |           |       | training interventions "I train people are valuable, their input, | 5                                                           |   |
| Junior Doctor-Patient Safety Attitudes and Climate Questionnaire                                                                                                                                                                                                           | Yes                                    | Quantitative                             | The Junior Doctors' Patient Safety Attitudes and Cl                                                        | Durani P, Dias J, Singh HP, Taub N. Junior doctors and                                                                                                                                                 |            |                                         |                       |                            |                |                          |                      |                        |          |                          |                           |           |       |                                                                   | 8                                                           |   |
| Safety Climate Survey (SCS) - based on SAQ, developed by Sexton                                                                                                                                                                                                            | Yes                                    | Quantitative                             | A 19-21 item derivative of the SAQ, it assesses safe                                                       | Squires M, Tourangeau A, Laschinger HKS, Doran D, et al. <i>Journal of Patient Safety</i> . 2018;17(1):1-6.                                                                                            |            |                                         |                       |                            |                |                          |                      |                        |          |                          |                           |           |       |                                                                   | 8                                                           |   |
| Chinese Hospital Survey on Patient Safety Culture - developed by Ahmed et al. 2018                                                                                                                                                                                         | Yes                                    | Quantitative                             | Based theoretically on Zohar's model of safety culture                                                     | Zhu J, Li L, Zhao H, Han G, Wu AW, Weingart SN, D, et al. <i>Journal of Patient Safety</i> . 2018;17(1):1-6.                                                                                           |            |                                         |                       |                            |                |                          |                      |                        |          |                          |                           |           |       |                                                                   | 8                                                           |   |
| The Patient Safety and Infection Prevention Assessment - described in a Hazardous Drug Handling Questionnaire - developed by Polovich and Modified Stanford Patient Safety Culture Instrument (MSI) - developed by MaPSaF + interviews, focus groups + analysis of reports | Yes                                    | Quantitative                             | Survey includes Likert and open response questions                                                         | Brown BL, Harris AD, Richards CL, et al. Does health ca                                                                                                                                                |            |                                         |                       |                            |                |                          |                      |                        |          |                          |                           |           |       |                                                                   | 7                                                           |   |
| Hospital Organizational Culture Questionnaire - developed by Gershon et al. 2008                                                                                                                                                                                           | Yes                                    | Quantitative                             | Available in a number of iterations (2005, 2006), the                                                      | Castel ES, Ginsburg LR, Zaher S, Tamim H, Understa                                                                                                                                                     |            |                                         |                       |                            |                |                          |                      |                        |          |                          |                           |           |       | E.g. "My work area is kept clean"                                 | 7                                                           |   |
| Manchester Patient Safety Framework (MaPSaF) - developed by the Agency for Healthcare Research and Quality                                                                                                                                                                 | Yes                                    | Quantitative                             | Pre-post intervention study with MaPSaF run as work                                                        | Simons PAM, Houben R, Vlayen A, et al. Does lean m                                                                                                                                                     |            |                                         |                       |                            |                |                          |                      |                        |          |                          |                           |           |       |                                                                   | 10                                                          |   |
| unfilled survey - developed by Matsubara et al. 2008                                                                                                                                                                                                                       | Yes                                    | Quantitative                             | A Japanese language survey with 24 items in eight                                                          | Koboue H, Morishima T, Tanaka M, Murakami G, Hirose M, Imanaka Y. Visualizing variat                                                                                                                   |            |                                         |                       |                            |                |                          |                      |                        |          |                          |                           |           |       |                                                                   | 7                                                           |   |
| Patient Safety Culture Questionnaire - developed by Veterans Affairs                                                                                                                                                                                                       | Yes                                    | Quantitative                             | Similar to the HSOPS, the survey consisted of 68 the                                                       | Mohr, D. C., J. L. Eaton, K. M. McPhaul and M. J. Ho                                                                                                                                                   |            |                                         |                       |                            |                |                          |                      |                        |          |                          |                           |           |       | patient care training interventions "I seek opinions ab           | 7                                                           |   |
| Patients' Perceptions of Safety Culture Scale (PaPSC) - developed by Gershon et al. 2008                                                                                                                                                                                   | Yes                                    | Quantitative                             | Developed from the HSOPS, SAQ and patient exper                                                            | Monaca, C., B. Bestmann, M. Kattcin, D. Langner, H. V                                                                                                                                                  |            |                                         |                       |                            |                |                          |                      |                        |          |                          |                           |           |       | Communication with patients - "I always felt that staff list      | 7                                                           |   |
| Pharmacy Safety Climate Questionnaire - developed by Ashcroft and Safety Climate and Capability (SCC) - developed by Bennett                                                                                                                                               | Yes                                    | Quantitative                             | Thirty-four item survey covering: investigating and                                                        | Walpola RL, Chen TF, Fois RA, Ashcroft DM, Lalor D, et al. <i>Journal of Patient Safety</i> . 2018;17(1):1-6.                                                                                          |            |                                         |                       |                            |                |                          |                      |                        |          |                          |                           |           |       |                                                                   | 7                                                           |   |
| Victorian Safety Culture Survey (VSCS) - developed by Sexton et al. 2006                                                                                                                                                                                                   | Yes                                    | Quantitative                             | The 74 survey items were adapted from the SAQ and                                                          | Stanton J, Burns S, Adams A, Pano A, Vincent C, Facht                                                                                                                                                  |            |                                         |                       |                            |                |                          |                      |                        |          |                          |                           |           |       |                                                                   | 6                                                           |   |
| Leading a Culture of Quality in Infection Prevention (LQIP) - developed by Patient Safety Culture Assessment Scale (PSCAS) - adapted by Chen                                                                                                                               | Yes                                    | Quantitative                             | Based on the SAQ for use in China, the PSCAS cont                                                          | Hong S, Li Q. The reasons for Chinese nursing staff to                                                                                                                                                 |            |                                         |                       |                            |                |                          |                      |                        |          |                          |                           |           |       |                                                                   | 6                                                           |   |
| Quality and Patient Safety Culture - developed by Zohar and Luria 2003                                                                                                                                                                                                     | Yes                                    | Quantitative                             | Originally two 27 item scales assessing organisatio                                                        | Hughes LC, Chang Y, Mark BA, Quality and strengt                                                                                                                                                       |            |                                         |                       |                            |                |                          |                      |                        |          |                          |                           |           |       |                                                                   | 6                                                           |   |
| unfilled survey - developed by Wilson et al. 2010                                                                                                                                                                                                                          | Yes                                    | Quantitative                             | Based on PSC and HSOPS, and other instr                                                                    | Pringle J, Weber RJ, Rice K, Kirrali I, Sinto S. Exam                                                                                                                                                  |            |                                         |                       |                            |                |                          |                      |                        |          |                          |                           |           |       |                                                                   | 6                                                           |   |
| National Emergency Department Safety Study Survey                                                                                                                                                                                                                          | Yes                                    | Quantitative                             | The survey contains 50 questions about systems in                                                          | Magid D, Sullivan AV, Cleary PD, et al. The safety of                                                                                                                                                  |            |                                         |                       |                            |                |                          |                      |                        |          |                          |                           |           |       |                                                                   | 6                                                           |   |
| unfilled survey - developed by Schwonke et al. 2016                                                                                                                                                                                                                        | Yes                                    | Quantitative                             | A Portuguese language survey based on the PSCL, it                                                         | Schwonke CRGB, Filho WD, Lunardi GL, da Silveira                                                                                                                                                       |            |                                         |                       |                            |                |                          |                      |                        |          |                          |                           |           |       |                                                                   | 6                                                           |   |
| unfilled survey - developed by Wilson et al. 2010                                                                                                                                                                                                                          | Yes                                    | Quantitative                             | This survey focuses on safety culture in the context                                                       | Wang Y, H. Han, L. Qin, C. Liu, Y. Wang and W. Liu                                                                                                                                                     |            |                                         |                       |                            |                |                          |                      |                        |          |                          |                           |           |       |                                                                   | 6                                                           |   |
| Attitudes to Patient Safety Questionnaire III (APSQ III) (Caruthers et al. 2000)                                                                                                                                                                                           | Yes                                    | Quantitative                             | Survey measures patient safety attitudes over nine                                                         | Ahu-EI-Noor, N. L. M. K., Abu-EI-Noor, Y. Z., Abusouda, M. Alfaqawi and B. Bötcher (20                                                                                                                 |            |                                         |                       |                            |                |                          |                      |                        |          |                          |                           |           |       |                                                                   | 5                                                           |   |
| General Safety Culture Survey - developed by Neal et al. 2000                                                                                                                                                                                                              | Yes                                    | Quantitative                             | A 25 item survey of safety culture in general (rather                                                      | Amponsah-Tawiah K, Adu MA. Work Pressure and Sa                                                                                                                                                        |            |                                         |                       |                            |                |                          |                      |                        |          |                          |                           |           |       |                                                                   | 5                                                           |   |
| California-Patient Safety Culture Survey (Cal-PSCS) - developed by Birkmeyer et al. 2013                                                                                                                                                                                   | Yes                                    | Quantitative                             | Survey developed from the HSOPS and SAQ, focus                                                             | Birkmeyer NJ, Finks JF, Greenberg CK, et al. "Patient                                                                                                                                                  |            |                                         |                       |                            |                |                          |                      |                        |          |                          |                           |           |       |                                                                   | 5                                                           |   |
| Ethnography - interviews, observations, document analysis using Hahn                                                                                                                                                                                                       | Yes                                    | Qualitative                              | Informal conversations, interview conducted. Docu                                                          | Breneser, G., J. Wallenburg, R. Osthauser, M. oude Egberink and K. Lombarts (2020). "Patient safety in medical residency training: Balancing brevity and checklists." <i>Health (United Kingdom)</i> . |            |                                         |                       |                            |                |                          |                      |                        |          |                          |                           |           |       |                                                                   | workarounds, independence and medical autonomy              | 1 |
| unfilled survey - developed by Ferre et al. 2018                                                                                                                                                                                                                           | Yes                                    | Quantitative                             | Developed in part from the HSOPS, this 35 item me                                                          | Ferre, M., R. Sautra, A. Medkache, E. Calvo and L. P. Molina-Sánchez (2018). "Drivers of                                                                                                               |            |                                         |                       |                            |                |                          |                      |                        |          |                          |                           |           |       |                                                                   | 5                                                           |   |
| unfilled survey - developed by Gibbs et al. 2018                                                                                                                                                                                                                           | Yes                                    | Qualitative                              | Specifically focused on infection control, this survey                                                     | Gibbs, K., S. DeMaria, S. McKinney, A. Fede, A. Harrington, D. Hutchinson, G                                                                                                                           |            |                                         |                       |                            |                |                          |                      |                        |          |                          |                           |           |       |                                                                   |                                                             | 5 |
| Interviews and observation                                                                                                                                                                                                                                                 | Yes                                    | Qualitative                              | Interviews and observations used to evaluate trainee                                                       | De Korne DF, Van Wijngaarden JD, Van Dyck C, Hid                                                                                                                                                       |            |                                         |                       |                            |                |                          |                      |                        |          |                          |                           |           |       |                                                                   |                                                             | 5 |
| unfilled survey - developed by Simsekler 2019 + interview                                                                                                                                                                                                                  | Yes                                    | Mixed meth                               | Survey based on some dimensions of the MaPSaF                                                              | Simsekler, M. C. E. (2019). "The link between healthcare risk identification and patient safety culture." <i>International Jo</i>                                                                      |            |                                         |                       |                            |                |                          |                      |                        |          |                          |                           |           |       |                                                                   | Dimensions reformulated to assess risk identification prac  | 4 |
| unfilled survey - developed by Kido et al. 2008                                                                                                                                                                                                                            | Yes                                    | Quantitative                             | A Japanese survey with 30 items assessing the follow                                                       | Kido Y, Kido S, Taruzuka Shaluzad M, Saegusa Y, Sait                                                                                                                                                   |            |                                         |                       |                            |                |                          |                      |                        |          |                          |                           |           |       |                                                                   | 5                                                           |   |
| unfilled survey - developed by Lisatoyadondo et al. 2012                                                                                                                                                                                                                   | Yes                                    | Quantitative                             | Developed from the SAQ and Job Diagnostic Survey                                                           | Lisatoyadondo TA, Nap RE, Johnson A. Variations in                                                                                                                                                     |            |                                         |                       |                            |                |                          |                      |                        |          |                          |                           |           |       |                                                                   | 9                                                           |   |
| HSOPS - focus groups with interactive qualitative analysis                                                                                                                                                                                                                 |                                        | Mixed meth                               | Following administration of the survey, a focus group                                                      | Sine DM, Northcutt N. Interactive qualitative assessme                                                                                                                                                 |            |                                         |                       |                            |                |                          |                      |                        |          |                          |                           |           |       |                                                                   | 5                                                           |   |
| HSOPS - focus groups, Theoretical Domains Framework                                                                                                                                                                                                                        |                                        | Mixed meth                               | HSOPS data used to identify areas to cover in interv                                                       | Stewart, D., B. Thomas, K. MacLure, A. Pallivalapala,                                                                                                                                                  |            |                                         |                       |                            |                |                          |                      |                        |          |                          |                           |           |       |                                                                   | 9                                                           |   |
| Ethnography - interviews and observation                                                                                                                                                                                                                                   |                                        | Qualitative                              | Interview schedule focused on teamwork and comm                                                            | Gillespie BM, Gwinner K, Chaboyer W, Fairweather N. Team communications in surgery                                                                                                                     |            |                                         |                       |                            |                |                          |                      |                        |          |                          |                           |           |       |                                                                   | developing a shared understanding, managing safety in co    | 3 |
| Just Culture Assessment Tool (JCAT) - developed by Pate                                                                                                                                                                                                                    | Yes                                    | Quantitative                             | of safety culture (from Reason's theory): "a                                                               | Petchonok S, Burleson J, Cross C, et al. Development of the just culture assessment tool: measuring the p                                                                                              |            |                                         |                       |                            |                |                          |                      |                        |          |                          |                           |           |       |                                                                   | 5                                                           |   |
| Veterans Health Administration (VHA) Hospital Survey of Safety                                                                                                                                                                                                             | Yes                                    | Quantitative                             | This survey assesses 5 domains of safety climate                                                           | Pringle J, Weber RJ, Rice K, Kirrali I, Sinto S. Exam                                                                                                                                                  |            |                                         |                       |                            |                |                          |                      |                        |          |                          |                           |           |       |                                                                   | 5                                                           |   |
| Hospital Transfusion Services Error Reporting and Safety Culture Survey                                                                                                                                                                                                    | Yes                                    | Quantitative                             | transfusion medicine, this survey contains 79 survey                                                       | Sorra J, Nieuw V, Faasman BR, Kaplan H, Schreiber G,                                                                                                                                                   |            |                                         |                       |                            |                |                          |                      |                        |          |                          |                           |           |       |                                                                   | Patient safety as a personal priority - Assuming personal r | 5 |
| Vienna Safety Climate Questionnaire (VSCQ) - developed by Focus groups and observation                                                                                                                                                                                     | Yes                                    | Quantitative                             | A German-language survey based in large part on o                                                          | Steyer J, Schifflinger M, Huber C, Valentin A, Strunk G                                                                                                                                                |            |                                         |                       |                            |                |                          |                      |                        |          |                          |                           |           |       |                                                                   | 5                                                           |   |
| Human Factors Attitude Survey (HFAS) - developed by Crogan et al.                                                                                                                                                                                                          | Yes                                    | Quantitative                             | Data collection and data analysis occurred in success                                                      | Gimenes FR, Torrieri MG, Gabriel CS, et al. Applying an ecological restorat                                                                                                                            |            |                                         |                       |                            |                |                          |                      |                        |          |                          |                           |           |       |                                                                   | 5                                                           |   |
| Safety Climate of Nurses (SCN) - Santarpia et al. 2015                                                                                                                                                                                                                     | Yes                                    | Quantitative                             | A 23 item survey based on one in aviation, it assesses                                                     | Wu WT, Wu YL, Hsu SM, et al. Examining the effects                                                                                                                                                     |            |                                         |                       |                            |                |                          |                      |                        |          |                          |                           |           |       |                                                                   | 5                                                           |   |
| Medical Students' Patient Safety Questionnaire - developed by Flyn                                                                                                                                                                                                         | Yes                                    | Quantitative                             | Originally developed to assess the students' levels of                                                     | Ahmed M, Aron S, Baker P, Hayden J, Vincent C, Seydalis N. Building capacity and capability for patient safety educ                                                                                    |            |                                         |                       |                            |                |                          |                      |                        |          |                          |                           |           |       |                                                                   | 4                                                           |   |
| Survey on Patient Safety Culture - developed by Naveh et al. 2005                                                                                                                                                                                                          | Yes                                    | Quantitative                             | The survey covers four dimensions - managerial saf                                                         | Custo, P. T., R. T. Custo and S. Buttigieg (2019). "The                                                                                                                                                |            |                                         |                       |                            |                |                          |                      |                        |          |                          |                           |           |       |                                                                   | 4                                                           |   |
| unfilled survey - developed by Hahn & Murphy, 2008                                                                                                                                                                                                                         | Yes                                    | Quantitative                             | A 6 item measure of global work safety climate, que                                                        | Hahn SE, Murphy LR. A short scale for measuring saf                                                                                                                                                    |            |                                         |                       |                            |                |                          |                      |                        |          |                          |                           |           |       |                                                                   | 4                                                           |   |
| unfilled survey - developed by Lowe 2012                                                                                                                                                                                                                                   | Yes                                    | Quantitative                             | Survey is comprised of the following six items: Error                                                      | Lowe G. How employee engagement matters for hospital performance. <i>Health</i>                                                                                                                        |            |                                         |                       |                            |                |                          |                      |                        |          |                          |                           |           |       |                                                                   | 4                                                           |   |
| Error Orientation Scale and Zohar Safety Climate Scale +                                                                                                                                                                                                                   | Yes                                    | Quantitative                             | This survey combines two scales, the Error Orienta                                                         | Mark BA, Hughes LC, Bolyea M, Bacon CT, Chang Y, et al. <i>Journal of Patient Safety</i> . 2018;17(1):1-6.                                                                                             |            |                                         |                       |                            |                |                          |                      |                        |          |                          |                           |           |       |                                                                   | 4                                                           |   |
| Medical Safety Climate Questionnaire - developed by Madrosky et al.                                                                                                                                                                                                        | Yes                                    | Quantitative                             | questionnaire with 28 items assessing knowledg                                                             | McCarty SE, O'Boyle G, O'Shaughnessy A, Winkler G. Online patient safety education programme for junior doctors.                                                                                       |            |                                         |                       |                            |                |                          |                      |                        |          |                          |                           |           |       |                                                                   | 4                                                           |   |
| unfilled survey - developed by Gimeno et al. 2005                                                                                                                                                                                                                          | Yes                                    | Quantitative                             | based in part on the HSCS and developed for Costa                                                          | Mendez CC, Gimeno D, Barrios-Gutiérrez Z, Bar                                                                                                                                                          |            |                                         |                       |                            |                |                          |                      |                        |          |                          |                           |           |       |                                                                   | 4                                                           |   |
| VA Employee Safety Perception Survey - developed by the National                                                                                                                                                                                                           | Yes                                    | Quantitative                             | The survey consisted of 50 questions that represent                                                        | Mohr, D. C., J. L. Eaton, K. M. McPhaul and M. J. Ho                                                                                                                                                   |            |                                         |                       |                            |                |                          |                      |                        |          |                          |                           |           |       |                                                                   | 4                                                           |   |
| unfilled survey - developed by Paez et al. 2013                                                                                                                                                                                                                            | Yes                                    | Quantitative                             | One domain of their survey focused on safety cultur                                                        | Paez K, Schur C, Zhao L, Lucado J. A national study of                                                                                                                                                 |            |                                         |                       |                            |                |                          |                      |                        |          |                          |                           |           |       |                                                                   | 4                                                           |   |
| HSOPS + interviews and framework for analysis                                                                                                                                                                                                                              |                                        | Mixed meth                               | Following survey, the interviews were aimed at ideat                                                       | Wami SD, Demissie AF, Wassie MM, Ahmed AN. Pati                                                                                                                                                        |            |                                         |                       |                            |                |                          |                      |                        |          |                          |                           |           |       |                                                                   | 9                                                           |   |
| Interviews and grounded theory                                                                                                                                                                                                                                             |                                        | Qualitative                              | Interviews conducted in a grounded theory design                                                           | Groves PS, Fringoli-Cornet D, Wakefield BJ. It's always something: hospita                                                                                                                             |            |                                         |                       |                            |                |                          |                      |                        |          |                          |                           |           |       |                                                                   | managing risk - viewing performance as a work               | 3 |
| Safety Climate Questionnaire - developed by Zeidi et al. 2012                                                                                                                                                                                                              | Yes                                    | Quantitative                             | This 37 item questionnaire includes 8 aspects of man                                                       | Yari, S., M. H. Nassiri, H. Akbari, S. Shabassvari and H                                                                                                                                               |            |                                         |                       |                            |                |                          |                      |                        |          |                          |                           |           |       |                                                                   | 4                                                           |   |
| unfilled survey - developed by Al Faqeeh et al. 2019                                                                                                                                                                                                                       | Yes                                    | Quantitative                             | An English-language survey assessing safety behav                                                          | Al Faqeeh, F., K. Ghali and A. Osman (2019). "Integr                                                                                                                                                   |            |                                         |                       |                            |                |                          |                      |                        |          |                          |                           |           |       |                                                                   | 4                                                           |   |
| unfilled survey - developed by Berman et al. 2018                                                                                                                                                                                                                          | Yes                                    | Quantitative                             | A surgery-focused questionnaire, asking surgeons w                                                         | Berman, L., S. Rangell, A. Goldin, D. Skarda, M. Ottos                                                                                                                                                 |            |                                         |                       |                            |                |                          |                      |                        |          |                          |                           |           |       |                                                                   | 3                                                           |   |
| unfilled survey - developed by Boyer et al. 2012                                                                                                                                                                                                                           | Yes                                    | Quantitative                             | A brief 7 item measure of safety climate with the fol                                                      | Boyer KK, Gardner JW, Schweikheart S. Process quali                                                                                                                                                    |            |                                         |                       |                            |                |                          |                      |                        |          |                          |                           |           |       |                                                                   | 3                                                           |   |
